# 1 **Development of PTSD-like behavior in adult mice after observing** 2 **an acute traumatic event**

3 Ray X. Lee,<sup>1,2\*</sup> Greg J. Stephens,<sup>2,3</sup> Bernd Kuhn<sup>1</sup>

## 4 **Affiliations:**

5 <sup>1</sup> Optical Neuroimaging Unit, Okinawa Institute of Science and Technology (OIST) Graduate  
6 University, Okinawa, Japan.

7 <sup>2</sup> Biological Physics Theory Unit, OIST Graduate University, Okinawa, Japan.

8 <sup>3</sup> Department of Physics and Astronomy, Vrije Universiteit Amsterdam, Amsterdam, The  
9 Netherlands.

10 \* Correspondence to: rayxin.lee@oist.jp

11 **Summary:** In human post-traumatic stress disorder (PTSD), a major psychiatry challenge is  
12 how diverse stress reactions emerge after a protracted symptom-free period. Here, we study  
13 the behavioral development in mice isolated after observing an aggressive encounter inflicted  
14 upon their pair-housed partners and compared the results with those in multiple control  
15 paradigms. Compared with mice plainly isolated, mice isolated following the acute witnessing  
16 social stress gradually developed a wide range of long-term differences of their physiological  
17 conditions, spontaneous behaviors, and social interactions, including paradoxical results if  
18 interpreted in traditional ways. To address this developmental diversity, we applied fine-scale  
19 behavioral analysis to standard behavioral tests and showed that the seemingly sudden  
20 emergent behavioral differences developed gradually. Mice showed different developmental  
21 patterns in different zones of a behavior testing apparatus. However, the results of the fine-  
22 scale analysis together with state-space behavioral characterization allow a consistent  
23 interpretation of the seemingly conflicting observations among multiple tests. Interestingly,  
24 these behavioral differences were not observed if the aggressive encounter happened to a  
25 stranger mouse. Additionally, traumatized mice showed rebound responses to their partners  
26 after the long separation. In contrast, mice pair-housed with their attacked partners after the  
27 aggressive encounters still showed a difference in social interactions, while a difference in  
28 spontaneous behaviors did not occur. Accordingly, we propose that social relationship is the  
29 single common factor underlying the otherwise independent development of behavioral  
30 differences in this mouse paradigm and that the gained insights could have parallels in human  
31 PTSD development.

## 32 **Introduction**

33           Stress reactions can emerge long after the triggering event. Stress incubation describes  
34 the time interval following an aversive event during which stress reactions emerge or increase.  
35 Since the phenomenon of anxiety and fear incubation was first formulated and summarized  
36 (Diven, 1937), stress incubation has been assumed to be spontaneous in the sense that the  
37 development of behavioral changes is highly determined by internal rather than external causes  
38 (McAllister DE, 1967). The phenomenon of stress incubation has received serious clinical and  
39 research attention in human psychiatry, especially characterized in the post-traumatic stress  
40 disorder (PTSD), one of the most prevalent mental health disorders (DSM-5, 2013; DSM-III,  
41 1980). Despite such prevalence, PTSD remains far from understood and controversial  
42 (McFarlane, 2010). The debates have even questioned the existence of PTSD (McHugh and  
43 Treisman, 2007; Walton et al., 2017), due to its diversity, inconsistency, and delayed onset of  
44 symptoms even after a protracted symptom-free period (Andrews et al., 2007; Pai et al., 2017).

45           To identify the psychopathological developments during stress incubation, it is  
46 beneficial to use an experimental assay with purely psychosocial manipulations on controlled  
47 subjective experiences and a homogeneous genetic background. Laboratory rodents have been  
48 used to study stress behavior and the pharmacology of stress (Calhoun and Tye, 2015; Cryan  
49 and Holmes, 2005; Kaouane et al., 2012; Tovote et al., 2015). A delay period before showing  
50 substantial stress reactions, suggesting stress incubation, was reported in the context of rodent  
51 models simulating human PTSD (Davis, 1989; Pamplona et al., 2011; Sullivan et al., 2017;  
52 Tsuda et al., 2015; Warren et al., 2013). The wide variety of aversive stimuli in these models  
53 range from acute physical stress (Balogh et al., 2002; Philbert et al., 2011) to prolonged  
54 witnessing of social defeat (Sial et al., 2016; Warren et al., 2013). Compared with mice  
55 experiencing direct social attacks, mice observing social attacks showed a more obvious  
56 phenomenon of stress incubation (Warren et al., 2013). This observation emphasizes the  
57 significance of emotional and cognitive processes, but not the direct impact of physical stress,  
58 in stress incubation (Hayes et al., 2012). Still, many major questions remain unanswered: Why  
59 do some symptoms attenuate while the others incubate? (Bryant et al., 2017, 2013) Why does  
60 a detailed difference in subjective experiences lead to dramatic variation in stress developments?  
61 (Adams and Boscarino, 2006) Why are symptoms usually treated partially within varied  
62 recovery contexts? (Harvey, 1996) Why does a treatment that rescues one's symptom even  
63 worsen the same symptom of another? (Scherer et al., 2017) Is stress incubation different from  
64 the formation, storage, and retrieval of fear memory? (Poulos et al., 2014)

65 To address such questions, we need a better understanding of the behavioral correlates  
66 in stress incubation. Here, we combined behavioral scenarios, analytic methods, and  
67 psychological hypotheses to study the development of stress incubation by psychobehavioral  
68 experiments in mice. We systematically, quantitatively, and longitudinally examined multiple  
69 physiological conditions (body mass, corticosterone level, brain connectome, etc.),  
70 spontaneous behaviors (light-dark box, open field, locomotion, etc.), and social interactions  
71 (female strangers, male strangers, pair-housed partners, etc.) of mice after observing acute  
72 social stress happening to their familiar partners (Figure 1A), with seven relevant control  
73 paradigms (Figure 1, B to H). Along the investigation, we introduced methods of fine-scale  
74 behavioral analysis and state-space behavioral characterization to overcome paradoxical and  
75 inconclusive results commonly observed in the traditional analyses of standard behavioral tests  
76 when the speculated emotions underlying behaviors are subtle and complex (Ramos, 2008).  
77 Lastly, we discussed a potential conceptual model of psychological framework based on our  
78 tests and observations in mouse stress incubation, which might provide insights on prevention,  
79 detection, and treatments of human PTSD development.

80

## 81 **Results**

### 82 *Long-term effects emerged after acute trauma induction*

83 To identify post-traumatic behavioral development with minimal physical impact and  
84 minimal peri-traumatic effects, we developed the following assay of an acute witnessing  
85 trauma (Figure 1A): Partnership between the male focal mouse and its male partner was  
86 established by housing them together for 3 weeks (Day-21–Day0). During this pair-housing,  
87 the mice slept together in a single nest which they built and no aggressive interaction (attacks,  
88 pursuits, and over-allogrooming) was observed. On Day0 (trauma induction), the focal mouse  
89 observed its partner being attacked by 5 different aggressor mice in succession (aggressive  
90 encounters) and stayed together with the attacked partner between each aggressive encounter  
91 (stress infiltration and resting). Importantly, the focal mouse only experienced the traumatic  
92 event by witnessing the attacks and by social communication and olfactory cues, but not  
93 through any direct physical threat, such as attack bites and pursuits from either the aggressors  
94 or its partner. After the last aggressive encounter, the focal observer mouse [Partner-  
95 Observing-Isolated (ParObsIso) mouse] was socially isolated for 4 weeks (Day0–Day28).  
96 Behavior was tested on Days -7, 1, 7, and 28.

97 To differentiate behavioral consequences from the trauma induction and the effects of  
98 isolation, adaptation to the tests, and aging, we first compared ParObsIso mice with a control  
99 group of mice isolated from their partners on Day0 without trauma induction [No-Scenario-  
100 Isolated (xScenIso) mice; Figure 1B]. We found that ParObsIso mice (n = 47) built nests with  
101 significantly higher walls than those constructed by xScenIso mice (n = 47) after isolation  
102 (Figure 2A). ParObsIso mice also increased their body mass in the late phase of the study  
103 (Figure 2B). Both observations indicate a long-term effect of the trauma induction.

104 To further explore potential physiological changes related to stress underlying the  
105 paradigm, we examined corticosterone concentrations in blood plasma. Compared with  
106 xScenIso mice, ParObsIso mice showed higher baseline plasma corticosterone level (CORT)  
107 after trauma, which reached statistical significance on Day28 (Figure 2C). In this experiment,  
108 we also compared CORT of ParObsIso mice with that of their partners, the attacked mice  
109 isolated after trauma [Directly-attacked-isolated (DirAtcIso) mice; n=5, note that 2 out of 5  
110 mice died on Days 4 and 5, respectively, without obvious physical trauma; interestingly, such  
111 losses were not observed in the directly attacked mice which were subsequently group-housed].  
112 The tendency of higher CORT was also observed in DirAtcIso mice which had a more obvious  
113 CORT increment during the early phase (Figure 2C), indicating that the observed differences  
114 of nest wall height and body mass may be phenotypes of stress.

115 To obtain indication of microstructural changes in the full brain correlated with these  
116 physiological and behavioral differences, we used diffusion tensor imaging (DTI) of brains  
117 collected on Day28 to analyze brain-wide microstructural differences (Figure 2, D to G;  
118 Supplemental Figures 1 to 4): Rather than a structural change in the hypothalamus which  
119 modulates CORT (DeMorrow et al., 2018), significant differences mainly occurred in both  
120 neocortex and hippocampus. For ParObsIso mice, compared with xScenIso mice, their DTI-  
121 based fractional anisotropy (FA; Figure 2D) was lower in anterior cerebral cortical areas  
122 including the primary somatosensory cortex, anterior cingulate cortex, and orbital cortex, but  
123 higher in posterior cerebral cortical areas including the retrosplenial cortex and the primary  
124 visual cortex. It was also higher in the hippocampus. Different measures of DTI-based water  
125 diffusivities [mean diffusivity (MD), axial diffusivity (AD), and radial diffusivity (RD); Figure  
126 2, E to G] were generally higher in the cerebral cortex and hippocampus of ParObsIso than in  
127 xScenIso mice. Interestingly, we observed an obvious asymmetry of the brain areas: Gray  
128 matters including the cerebral cortex and hippocampus showed differences in the right brain  
129 hemisphere, while white matters including the corpus callosum, anterior commissure, and  
130 cingulum bundle showed differences in the left brain hemisphere. The asymmetry of

131 diffusivity between the right and left brain hemispheres were most significant in the amygdala  
132 (right hemisphere shows higher diffusivity) and areas of the lateral cerebral cortical subnetwork  
133 including dorsolateral orbital cortex and insular cortex (left hemisphere shows higher  
134 diffusivity) for ParObsIso mice.

135 For long-range connections, the brains of ParObsIso mice show a significant increase  
136 of structural connections between the right hippocampus (CA3 and dentate gyrus) and right  
137 dorsolateral entorhinal cortex (Figure 2H) compared to the brain of xScenIso mice. While the  
138 entorhinal cortex is the main interface between the hippocampus and neocortex, we further  
139 tracked its long-range connections. The right dorsolateral entorhinal cortex showed  
140 significantly increased connections with the right perirhinal cortex, but had significantly  
141 decreased connections with the right piriform cortex (Figure 2H). Between the piriform and  
142 perirhinal cortices, we found a decrease of their connections (Figure 2H). Through brain-wide  
143 tracking, we revealed trauma-induced changes in the “perirhinal cortex–entorhinal cortex–  
144 hippocampus” system, the “retrosplenial cortex–hippocampus” system, the “piriform cortex–  
145 amygdala” system, and the “amygdala–hypothalamus” system. All of them centered at the  
146 anterior cingulate cortex (ACC; Figure 2I), suggesting that the emergence of long-term  
147 behavioral changes after trauma induction arise from network changes in this high-level  
148 cognitive and emotional center.

#### 149 *Fine-scale behavioral analysis revealed gradual stress development*

150 Spontaneous behaviors in a steady environment has been taken as a representation of  
151 internal states such as emotion (Archer, 1973). Behavioral tests for rodent anxiety-like  
152 reactions were designed to evaluate their stress reaction against their willingness to explore  
153 (e.g. light-dark box and elevated plus-maze) or their activity under conditions with a gradient  
154 of uncertainty (e.g. open field). We first examined spontaneous behaviors in the light-dark box  
155 test (Figure 3A; n = 8 mice for each group), where the stressor was a natural aversion to brightly  
156 lit areas (Kumar et al., 2013). While the time spent in the light area did not differ significantly  
157 between xScenIso and ParObsIso mice on Day1, ParObsIso mice surprisingly spent more time  
158 in the light area than xScenIso mice on Days 7 and 28 (Figure 3A, left panels). This result  
159 raised the following questions: (i) Did this behavioral difference start to develop immediately  
160 after the traumatic event or only after a delay? (ii) What comparative emotionality does this  
161 behavioral difference indicate?

162 To answer (i), we examined the positions of the mice in the light-dark box on a fine-  
163 scale. Based on spatial symmetry, we analyzed  $T(x)$ , the cumulative probability distribution  
164 of time that the mouse spent at positions along the axis of the light-dark box (Figure 4A, top-

165 right scheme and the equation, and middle panels for the results). We calculated significance  
166 levels [presented as  $-\log$  of p-values,  $-\log(p)$ ] of  $T(x)$  between ParObsIso and xScenIso  
167 populations by computing position-dependent population means and applying a two-tailed,  
168 two-sample Student's t-test (Figure 3A, bottom-middle panels). Already on Day1, ParObsIso  
169 mice showed differences in their spatial distribution, as they spent less time than xScenIso mice  
170 at the far end of the dark area. This tendency increased with time: On Day 7, ParObsIso mice  
171 spent more time in the light area close to the door compared to xScenIso, and then on Day 28  
172 additionally on the far side of the light area. Collapsed  $-\log(p)$  distributions reveal the overall  
173 gradual increase in spatial preference differences (Figure 3A, right panel). Additionally,  
174 ParObsIso mice maintained a higher locomotor speed compared to the gradually decreasing  
175 speed of xScenIso mice (Figure 3B) and showed more transfers between the boxes and shorter  
176 latencies until their first transfers from Day 1 (Figure 3C). These results indicate an onset and  
177 gradual increase of behavioral differences immediately following the trauma.

178         Regarding (ii), we additionally examined their behaviors in the elevated plus-maze test  
179 (Figure 4A;  $n = 8$  mice for each group). In this test, stressors included fear of falling and  
180 exposure. After first exposure on Day-7 and separation, mice spent only a fraction of the time  
181 in the open arms of the maze, but with no significant difference between xScenIso and  
182 ParObsIso mice (Figure 4A, left panels). However, ParObsIso mice spent increasingly more  
183 time in the far end of the closed arms (Figure 4A, middle panels) and moved more slowly in  
184 the elevated plus-maze after trauma induction (Figure 4B) with longer periods of freezing and  
185 fewer entries to the central platform from the closed arms (Figure 4C). Although the gradually  
186 increasing differences between xScenIso and ParObsIso mice (Figure 4, A and B) was  
187 consistent, the opposite tendency of reactions in light-dark box and elevated plus-maze tests  
188 was seemingly paradoxical.

189         Seemingly conflicted results are regularly observed in traditional analyses of standard  
190 behavioral tests as the emotions underlying behaviors may be subtle and complex (Ramos,  
191 2008; Ramos et al., 2008). To investigate possible psychological interpretation of the opposite  
192 reactions, we compared the behaviors of xScenIso and ParObsIso mice in the tests with the  
193 tested behaviors of mice injected with caffeine, which induces anxiety somatically (DSM-5,  
194 2013), and mice after experiencing brief shocks, which induces anxiety cognitively (Bolton  
195 and Robinson, 2017), under the otherwise same experimental conditions and procedures.  
196 Reactions of cognitive anxiety are expected to be opposite of those shown in somatic anxiety  
197 (Cloninger, 1988). In addition, the behavioral characteristics of caffeine-injected mice and  
198 foot-shocked mice in standard tests remain controversial (Borsini et al., 2002; Gulick and

199 Gould, 2009; Suarez and Gallup, 1981; Wu et al., 2017), as what we also found when applying  
200 traditional analyses (Figure 5, A and B). To capture behavioral characteristics that may be  
201 overlooked in a subjective, low-dimensional representation, we first evaluated the local  
202 likelihood of a given behavioral state (described by position, instantaneous locomotor speed,  
203 instantaneous locomotor acceleration, and instantaneous velocity along the stressor-to-stressor-  
204 free axis) to be recorded from caffeine-injected, foot-shocked, or non-treated mice. Behavioral  
205 characteristics that are consistent within a group but varied across groups were therefore  
206 quantitatively identified. By referring local likelihoods distributed across entire behavioral  
207 state space (Supplemental Videos 1–6), we calculated the global likelihood of behaviors of  
208 xScenIso and ParObsIso mice in a test to be caffeine-injected-like, foot-shocked-like, or non-  
209 treated-like. While xScenIso mice kept showing non-treated-like behaviors in both tests  
210 although their behaviors in classical analyses changed, ParObsIso mice developed caffeine-  
211 injected-like behaviors in the light-dark box test and developed foot-shocked-like behaviors in  
212 the elevated plus-maze test after trauma induction (Figure 5, C and D). The results suggest that  
213 ParObsIso mice display more behaviors of chronic somatic anxiety when tested in the light-  
214 dark box test and more behaviors of chronic cognitive anxiety when tested in the elevated plus-  
215 maze test.

### 216 *Different developmental components were untangled from a single behavioral test*

217 Through our fine-scale behavioral analyses, we further observed that, in the light-dark  
218 box and elevated plus-maze tests, key incubation features were consistently more obvious  
219 within stressor-free zones (dark area and closed arms) than within stressor zones (light area  
220 and open arms). To quantitatively investigate the differences between zones, we analyzed  
221 locomotor speed, as an independent behavioral index of mouse position, separately in stressor-  
222 free and stressor zones (Figure 6). As expected, two different behavioral patterns developed  
223 in the two zones: While speed differences consistently increased in stressor-free zones (Figure  
224 6, B and D), speed differences in stressor zones only showed acute increases on Day1 (Figure  
225 6, A and C). These results suggest that different psychological components may be measured  
226 in the two zones.

227 Fear is a response to a known threat with a magnitude that increases with the strength  
228 of the threat, whereas anxiety is a response to uncertainty with a magnitude that increases with  
229 the uncertainty of a situation (Grupe and Nitschke, 2013). To better understand if these two  
230 developmental patterns observed under and close to the stressor may be uncertainty-related,  
231 we examined mouse locomotor speed in relatively uncertain and secure environments  
232 separately, using the open field test (Figure 7, A to C; n = 8 mice for each group) and the

233 locomotor activity test (Figure 7D; n = 8 mice for each group). In the open field test, mice  
234 were exposed to a dimly lit environment with a gradient of spatial uncertainty from the field  
235 center (high uncertainty) to the field boundaries (low uncertainty). In the locomotor activity  
236 test, mice were habituated in a dark and smaller environment with familiar cues of bedding  
237 materials from their homecages indicative of less environmental stress. Compared to xScenIso  
238 mice, ParObsIso mice moved faster in the center region of the open field (Figure 7A), which  
239 was not observed in the periphery (Figure 7B). The difference between groups increased  
240 gradually towards the center but not in the periphery (Figure 7, A and B). The avoidance of  
241 spatial uncertainty by ParObsIso mice was also reflected in the shorter time they spent near the  
242 center (Figure 7C, left panel) and showed a shorter latency to the first rearing during the test  
243 (Figure 7C, right panel). In contrast, ParObsIso mice moved significantly slower on Day1 in  
244 the locomotor activity test and recovered on Days 7 and 28 (Figure 7D), suggesting an acute  
245 post-traumatic impact under low stress condition. These results suggest a possibility that the  
246 differences of uncertainty-related spontaneous behaviors incubate, whereas that of uncertainty-  
247 unrelated spontaneous behaviors attenuate.

#### 248 ***Social differences weakly depend on emotional differences and vice versa***

249 Emotional responses simplify and speed up animal reactions to complex external cues  
250 and are critical in corresponding social interactions (Anderson, 2016). To test potential  
251 changes of social interactions in ParObsIso mice, we examined mouse social motivation in a  
252 two-session social test (Figure 8A) where a non-social session was followed by a social session  
253 (n = 5 mice for each group). The social stimulus was either a female or a male stranger mouse.  
254 During the social session, ParObsIso mice spent less time in social approaches of nose poking  
255 toward both female and male strangers, starting from Day1, and remained less social compared  
256 to xScenIso mice during the post-traumatic period (Figure 8B). The time they spent in the  
257 interaction zone around the social target, however, did not differ significantly from that of  
258 xScenIso mice (Figure 8C; Supplemental Video 7). Both, ParObsIso and xScenIso mice, spent  
259 only a short but similar time on nose poking during the non-social session through the  
260 recordings on different days, with no significant difference between ParObsIso and xScenIso  
261 populations (Figure 8D), indicating that the observed difference of nose poking time was  
262 specific to social behavior. In addition, less social vocalization was recorded during the female  
263 stranger test for ParObsIso mice (Figure 8E). These observations showed that trauma induction  
264 also caused long-term differences in social interactions.

265 To address the relation between emotion and social cognition, we next examined how  
266 the change of a particular social experience after the trauma induction could alter behavioral



267 development of both individual spontaneous behaviors and social interactions. An important  
268 condition in our behavioral paradigm was the forced social isolation after trauma, of which the  
269 potential effects should further be identified. We examined the impact of post-traumatic social  
270 condition on behavioral developments by the second control group of mice [Partner-  
271 Observing-Partner-Pair-Housed (ParObsParPH) mice; Figure 1C] as each of them was kept  
272 pair-housed with its attacked partner after trauma induction. Noteworthy, developments of  
273 the differences in spontaneous behaviors did not occur in ParObsParPH mice (Figure 9A,  
274 upper panels; Supplemental Figure 5A), but importantly, developments of behavioral  
275 differences in social interactions showed the differences of ParObsIso mice (Figure 9B, left  
276 panel). This observation implies the sufficiency of socially isolated condition for differences  
277 of individual spontaneous behaviors but not for that of social interactions, suggesting a weak  
278 inter-relationship between the development of emotional differences and that of social  
279 differences.

280 ParObsParPH mice experienced the same scenario of trauma induction as ParObsIso  
281 mice but had different post-traumatic social experiences, leading to a partial rescue of  
282 differences in spontaneous behaviors. To test the potential significance of the post-traumatic  
283 social factor in behavioral developments, we conducted two additional control experiments by  
284 alternating the post-traumatic environmental and physiological conditions, respectively, with  
285 the third control group of mice where each of them was provided with toys during social  
286 isolation after trauma induction [Partner-Observing-Isolated-Environment-Enriched  
287 (ParObsIsoEE) mice; Figure 1D], and the fourth control group of mice [Partner-Observing-  
288 Isolated-Fluoxetine-Treated (ParObsIsoFLX) mice; Figure 1E] as each of them was injected  
289 with fluoxetine daily after trauma. ParObsIsoEE mice showed similar nose poking times in  
290 the female stranger test as xScenIso mice (Figure 9B, middle panel); however, they showed the  
291 behavioral differences of ParObsIso mice in the light-dark box test, which even had a stronger  
292 difference starting from the early phase (Figure 9A, middle panels). For ParObsIsoFLX mice,  
293 while they showed less behavioral difference during the early post-traumatic phase in the light-  
294 dark box test (Figure 9A, bottom panels) and did not display a reduction of nose poking times  
295 in the female stranger test (Figure 9B, right panel), their behavioral difference in the light-dark  
296 box test reached significance in the late phase and the behavioral difference in elevated plus-  
297 maze test was more obvious in the closed arms after trauma induction (Figure 9A, bottom  
298 panels; Supplemental Figure 6A). The partial recusing and even partial strengthening of  
299 behavioral differences observed from these experimental alterations of post-traumatic social  
300 and non-social factors emphasize the sensitivity and complexity of context-wide behavioral  
301 development over stress incubation.

302 ***Social relationship determined context-wide behavioral development over stress incubation***

303 To address the psychobehavioral basis of stress incubation underlying the complexity  
304 of context-wide behavioral developments that may be weakly inter-dependent, we conducted  
305 the fifth control experiment where each of the mice was kept pair-housed with a stranger after  
306 trauma induction [Partner-Observing-Stranger-Pair-Housed (ParObsStrPH) mice; Figure 1F],  
307 altering the post-traumatic social relationship in the ParObsParPH paradigm. In the  
308 ParObsStrPH paradigm, if the pair-housed strangers were the socially defeated intruders of the  
309 trauma inductions, we observed aggressive attacks toward strangers by all focal mice (n=5 out  
310 of 5) during their pair-housing after trauma. Similar aggression was observed among  
311 ParObsIso mice, but not toward their defeated partners, when they were group-housed after  
312 trauma induction. Because of these observations of partnership-dependent aggressive or non-  
313 aggressive behaviors, we only conducted in-depth behavioral tests with the ParObsStrPH mice  
314 pair-housed with non-defeated strangers and recorded their behavior. ParObsStrPH mice did  
315 not display the development of behavioral differences in the light-dark box, elevated plus-maze,  
316 and female stranger tests (Figure 10A, upper panels; 10B, left panel; Supplemental Figure 6B).  
317 Only their position in the light-dark box test showed an acute difference (Figure 10A, upper  
318 panels). These results indicate that a single factor of social relationship after trauma induction  
319 may govern context-wide developments into long-term behavioral differences.

320 Following the evidence that social relationship governs the behavioral development  
321 after the trauma induction, we further examined potential contribution of social experience on  
322 trauma induction by conducting two additional control experiments with the alternation of  
323 social factors during trauma induction. In the sixth control group of mice [Non-Aggressor-  
324 Exposed-Isolated (xAggrExpIso) mice; Figure 1G], the aggressor mice for trauma induction  
325 were replaced by non-aggressive strangers. xAggrExpIso mice did not show the developments  
326 of behavioral differences in both spontaneous behaviors (Figure 10A, bottom panels) and social  
327 interactions (Figure 10B, right panel), confirming that, instead of the increased number of mice  
328 during trauma induction (visual exposure to 5 different aggressors), social aggression is  
329 necessary to induce development of behavioral differences.

330 For the seventh group of mice [Stranger-Observing-Isolated (StrObsIso) mice; Figure  
331 1H], each of the mice observed different stranger mice being attacked by different aggressors  
332 and stayed together with each stranger between aggressive encounters before isolation.  
333 StrObsIso mice did not experience any physical stress from strangers or aggressors. During  
334 trauma induction, two notable behavioral differences were observed: While tail rattling during  
335 aggressive encounters and hiding under bedding material with the partner during resting were

336 observed in 83% (n = 39 out of 47 mice) and 100% (n = 47 out of 47 mice) ParObsIso mice  
337 (Supplemental Video 8), respectively, no such behaviors were shown by StrObsIso mice (n =  
338 0 out of 20 mice; n = 0 out of 20 mice). In ParObsIso mice, the frequency of tail rattles dropped  
339 progressively during aggressive encounters (Figure 11A), representing a transient reaction  
340 during trauma induction. These results suggest that social relationship may rapidly modulate  
341 emotional impact and social reactions during the trauma induction. Moreover, chronic  
342 behavioral differences were not observed in StrObsIso mice (Figure 11, B to F), which further  
343 excluded potential effects from salient, non-specific environmental manipulation (e.g. rotation  
344 through aggressors' home cages) and sensory shock (e.g. olfactory cues from urine and  
345 vocalization indicating fear) during trauma induction. Taken together, these results show that  
346 social relationship constitutes as a critical factor of trauma induction and its following context-  
347 wide developments of behavioral differences.

348         Considering social relationship as the key factor, an important question remained: Why  
349 did behavioral differences in the putatively uncertainty-related component of spontaneous  
350 behaviors gradually increase during stress incubation, but not remain constant or attenuate? To  
351 address this issue, we examined the persistence of social memory in a partner-revisiting test on  
352 Day28 (Figure 12A; n = 5 mice for each group). Social stimuli were the previous partner and  
353 a stranger mouse, both immobilized to allow enough social cues to be attractive, but no active  
354 interaction with the focal mouse. To avoid possible influences of social cues from socially  
355 defeated mice, stranger mice used to test xScenIso and StrObsIso mice were partners of  
356 ParObsIso mice. Strikingly, ParObsIso mice as well as ParObsIsoPH mice, which were  
357 separated from their partners right before their partners got immobilized for the tests, spent  
358 three times as much time allogrooming or pushing their previous partners as did xScenIso,  
359 xAggrExpIso, and StrObsIso mice (Figure 12B and Supplemental Video 9). The preference of  
360 ParObsIso mice to their previous partners, together with the contribution of social relationship  
361 to context-wide developments of behavioral differences after separation, implies that the  
362 uncertainty of partnership may be a key mechanism of the gradually increasing difference in  
363 uncertainty-related behaviors in our paradigm.

364

## 365 **Discussion**

366         We present an approach to interpret otherwise challenging and inconclusive behavioral  
367 data and use it to study stress incubation in laboratory mice. The results demonstrate a system-  
368 level view of experimentally disentangled components, processes, and determinants in stress  
369 development. We report the asymmetry of brain-wide microstructural changes and the

370 strengthening of an ACC-centered network in mice after acute witnessing social stress. Based  
371 on the context-wide observations from our experiments, we propose that social relationship, as  
372 the single common factor, may underlie the otherwise independent development of stress  
373 incubation. Our study provides technical and conceptual advances which could be considered  
374 in the study of human psychiatry disorders such as PTSD.

### 375 *Detection and identification of animal emotion*

376 We argue that classical behavioral analyses of standard tests can be too coarse to  
377 capture intricate emotional states. The traditional approach to identify animal emotion is to  
378 test if animals show particular behaviors specified by the experimental test assumed when it  
379 was designed (Walf and Frye, 2007). However, experimental animals normally display  
380 obvious but not inter-supporting behaviors in different tests with the same logic and  
381 assumptions (Ramos, 2008). Furthermore, even if the behavioral results are consistent with  
382 the expectation, they can still be alternatively explained (Garcia et al., 2008). This ambiguity  
383 reaches deeply into the history of widely used behavioral tests and therefore have resulted in a  
384 considerable amount of inconclusive and seemingly paradoxical results, which are usually left  
385 for discussion or remain unreported (Carobrez and Bertoglio, 2005; Crusio, 2013; Engin and  
386 Treit, 2008; Ennaceur, 2014; Hascoët et al., 2001; Henriques-Alves and Queiroz, 2016;  
387 Kuleskaya and Voikar, 2014). The limitations can be due to circular arguments embedded in  
388 a reductive logic. Classically, researchers addressed the difficulties by an effort to show a  
389 proof-of-concept (Vasconcelos et al., 2012). Therefore, studies frequently use multiple tests  
390 to assess the same psychological phenomenon. With this approach, research on animal emotion  
391 usually emphasize their ability to show human behavioral and physiological conditions (face  
392 validity), to reproduce pharmacological effects in human (predictive validity), and to share the  
393 same biological processes as human (construct validity) (Calhoon and Tye, 2015), although a  
394 few studies have taken the possibility of human-unique, animal-unique, and human-animal-  
395 sharing emotions under consideration (Anderson and Adolphs, 2014). To date, for the long  
396 and widely used behavioral tests, a standardized method objectively identifies and quantifies  
397 emotion from a continuous, high-dimensional state-space of behaviors is still absent.

398 In this study, we introduced fine-scale behavioral analysis and state-space behavioral  
399 characterization to access animal emotion from standard behavioral tests which give  
400 inconclusive results when analyzed and interpreted in the traditional way. Taking our  
401 observations as an example, higher nest wall (Figure 2A), higher baseline corticosterone levels  
402 (Figure 2C), more time spent in the far end of closed arms (Figure 4A), less exploration from  
403 closed arms to center (Figure 4C, left panel), longer freezing time (Figure 4C, right panel), and

404 slower locomotion (Figure 4B) in the elevated plus-maze test, more time spent in the center  
405 region (Figure 7C, left panel), and shorter latency to the first rearing (Figure 7C, right panel)  
406 in the open field test, slower locomotion in the locomotor activity test (Figure 7D), and less  
407 nose poking (Figure 8B) and vocalization (Figure 8E) in the stranger tests are classically more  
408 acceptable as stress reactions. However, we also note that increased body mass (Figure 2B),  
409 more time spent in light area (Figure 3A), faster locomotion (Figure 3B), more transfers (Figure  
410 3B, right panel), shorter latency to the first transfer (Figure 3C, right panel) in the light-dark  
411 box test, spending similar time around social targets in the stranger tests (Figure 8C), and more  
412 social reactions to previously pair-housed partners (Figure 12B) are more controversial in  
413 classic readouts. As an example, if only focusing on the observations of increased body mass  
414 and higher nest wall (Figure 2, A and B), they can be interpreted as having better emotional  
415 stability and therefore nicer nests and better appetites, or manifesting protective responses of  
416 anxiety by hiding behind higher nest walls and engaging in anxiety-induced binge eating (Goto  
417 et al., 2014; Otabi et al., 2017). Discussing potential interpretations or possible factors of these  
418 massive observations can be endless and easily lead to skeptical arguments especially if the  
419 focused psychobehavioral substrate is complex. With both richer measurements and  
420 quantitative analyses, we were able to discover subtle behavioral differences and identify  
421 otherwise obscured behavioral details in stress incubation. In addition, we propose to interpret  
422 psychological meaning based on experimental comparison and correlation with physical  
423 variables of the testing environment, rather than based on the expectation of presumed  
424 observations, as traditionally done. Importantly, founded on computational ethology  
425 (Anderson and Perona, 2014; Chen et al., 2013; Nath et al., 2019), providing a validly  
426 consistent overview of data interpretations for context-wide observations across the  
427 experiments becomes possibly more reliable and more effective.

#### 428 ***From stress incubation in mice to human PTSD development***

429 Behavioral paradigms of laboratory rodents that simulate PTSD were established to  
430 expose the mechanistic insights of long-term fear memory following acute physical stress  
431 (Balogh et al., 2002; Philbert et al., 2011) or learned depression after repeated social defeat  
432 (Sial et al., 2016; Warren et al., 2013). The diversity of PTSD models in mice is even  
433 highlighted by a paradigm of trauma-free pharmacologically-induced memory impairments in  
434 mice, which was recognized as a PTSD model and further identified the corresponding  
435 pathophysiological mechanism (Kaouane et al., 2012). Although witnessing social defeat  
436 models in rodents were developed, an identification of post-traumatic stress incubation was

437 still challenged by significant effects of the prolonged peri-traumatic stress development from  
438 the repeated trauma induction for more than a week (Patki et al., 2014; Warren et al., 2013).

439 In this study, we found little support for the common view that an association among  
440 psychological states, such as emotion and social motivation, govern the developmental process  
441 (Andrews et al., 2007; Bryant et al., 2017; DSM-5, 2013; DSM-III, 1980; Ehlers and Clark,  
442 2000; Hayes et al., 2012; Pamplona et al., 2011; Schnyder and Cloitre, 2015; Siegmund and  
443 Wotjak, 2006; Zoladz and Diamond, 2013). We observed continuous growth of the differences  
444 in uncertainty-related spontaneous behaviors while that of uncertainty-unrelated spontaneous  
445 behaviors had long vanished (Figures 4 to 7). The time course of substantial social differences  
446 also led the substantial differences of uncertainty-related spontaneous behaviors (Figures 4, 5,  
447 and 8). In addition, pair-housing with partner mice selectively rescued the increased  
448 differences of spontaneous behaviors but not social differences (Figure 11), and, in contrast,  
449 environmental enhancement selectively strengthen the differences of spontaneous behaviors  
450 but reduced the differences in social behavior (Figure 9A, middle panels). However, even with  
451 this weak behavioral correlate of different psychological aspects in stress incubation, we found  
452 that there is a single factor, social relationship, commonly mediating diverse behavioral  
453 developments. Alternation of a single social cognitive factor, social relationship, eliminated  
454 behavioral differences from mice without traumatic experience (Figures 10 and 11).  
455 Conceptualization of social support as a “stress buffer” have been proposed to explain the  
456 positive association between responsive social resources in a small social network and adverse  
457 effects of stressful events (Cohen and Wills, 1985). Indeed, among all rescue controls,  
458 including social, environmental, or pharmacological approaches (Figure 9, C to F), pair-  
459 housing with non-defeated stranger mice showed the best rescuing effects on diverse  
460 behavioral developments in our paradigm (Figure 12). In the collective model (Figure 13A),  
461 behaviors slowly change and influence each other during stress incubation until a new,  
462 abnormal equilibrium is reached; this new equilibrium is then defined as PTSD. However,  
463 based on our observations and tests, we propose that a specific internal cause and its related  
464 processes play a dominant role in stress incubation. In this unitary model (Figure 13B), a single  
465 common factor underlies the otherwise independent development of post-traumatic behaviors  
466 in mice.

467 From DTI scanning, we also found asymmetric microstructure differences and an  
468 asymmetric enhanced, ACC-centered network in the two brain hemispheres, 28 days after the  
469 witnessing of social stress. This is in agreement with previous finding that the right but not the  
470 left ACC controls observational fear learning in mice (Kim et al., 2012). The brain heavily

471 integrates not only external but also internal causes (Donaldson et al., 2015; Funamizu et al.,  
472 2016; Kohl et al., 2018; Larkum, 2013; Lee et al., 2014; R. X. Lee et al., 2015; Matias et al.,  
473 2017; Murugan et al., 2017; Remedios et al., 2017; Roome and Kuhn, 2018; Tononi et al., 2016;  
474 Zelikowsky et al., 2018). The potentially slow and global change of brain dynamics may arise  
475 from an altered dynamic in social bonding circuits through their interconnected nodes (Ko,  
476 2017). By correlating with freezing behavior following a single scrambled foot shock in mice,  
477 early inhibition of PTH2R (parathyroid hormone 2 receptor)-mediated TIP39  
478 (tuberoinfundibular peptide of 39 residues) signaling in the medial amygdalar nucleus was  
479 demonstrated to enhance fear memory much later (Tsuda et al., 2015). Following this line, a  
480 delay in generalized avoidance was proposed developing from an amplification of fear  
481 expression (Houston et al., 1999; Pamplona et al., 2011; Sullivan et al., 2017). Interestingly,  
482 the connections between the piriform and perirhinal cortices decreased (Figure 2, H and I). The  
483 piriform and perirhinal cortices are the two core parahippocampal structures involve in the  
484 kindling phenomenon, the daily progressive increase in response severity of both  
485 electrographic and behavioral seizure activity (McIntyre, 2006; McIntyre and Kelly, 2006)  
486 supposedly linked to fear conditioning in rat PTSD models (Knox et al., 2012; Rau et al., 2005).  
487 In human PTSD research, the amygdala, medial prefrontal cortex, and hippocampus are the  
488 brain regions traditionally focused on (Shin et al., 2006), with reports emphasizing the  
489 morphology of the right hippocampus (Gilbertson et al., 2002; Pavić et al., 2007). Our findings  
490 extend these observations to laboratory rodent model of witnessing stress under experimental  
491 conditions.

492 The medial prefrontal cortex (mPFC), which includes ACC and prelimbic cortex (PL)  
493 in mice, have been reported to exhibit both functional and physiological asymmetry between  
494 hemispheres. For examples, the right mPFC was reported to control the acquisition of stress  
495 during hazardous experiences while the left mPFC was found to play a dominant role in  
496 translating stress into social behavior (E. Lee et al., 2015). The effects of erythropoietin on  
497 inhibitory synaptic transmission in the left and right PL of mice were also found to be opposite  
498 (Dik et al., 2018). Furthermore, neuromodulatory systems can play an important role  
499 in lateralized circuitry processing. Oxytocin receptor expression is lateralized as there are more  
500 OXTR-2 receptors on the left side of the auditory cortex in adult females (Marlin and Froemke,  
501 2017). Based on this asymmetric nature, an oxytocin-mediated balancing of left and right  
502 cortical synaptic inhibition was reported to enable maternal behavior in mice (Marlin et al.,  
503 2015). Stress-induced mesocortical dopamine activation was found for the right mPFC but not  
504 the left (Sullivan and Gratton, 1998). Additionally, serotonin selectively regulates mPFC  
505 callosal projection neurons (Avesar and Gullledge, 2012; Stephens et al., 2014), suggesting

506 specific roles of the communication between left and right mPFC although they are functionally  
507 distinct. These lateralized changes on the right side due to stress experience is consistent with  
508 our observation of the changes of cortical microstructures and fibers on the right hemisphere  
509 in mice showing PTSD-like behavior. This is comparable to the predominantly right cortical  
510 volumetric differences in human PTSD (Bremner et al., 2005; Gilbertson et al., 2002). While  
511 most mechanistic or neuronal recording studies in mice only focused on one side of the brain  
512 or simultaneously regulated both sides of the brain, our data highlight a requirement for special  
513 attention on hemisphere-specific control of cognitive and emotional processes.

514 Although we focused on stress incubation in mice, our work may provide several  
515 important insights to complex human psychiatry, especially PTSD development. Complex  
516 developmental trajectories of human PTSD symptoms were demonstrated with associated  
517 physiological and environmental regulators (Bryant et al., 2013), yet the combination of  
518 psychological therapy and pharmacotherapy does not provide a more efficacious treatment than  
519 psychological therapy alone (Hetrick et al., 2010; Mataix-Cols et al., 2017). Our research  
520 provides a foundation to test pharmacotherapies on a system-level that integrates multiple  
521 mechanisms underlying highly diverse behavioral consequences. The efficacy of  
522 pharmacotherapies could therefore be improved. While much remains to be considered before  
523 clinical applications, our study establishes a solid basis to uncover psychological theories for  
524 therapeutic strategies (Schnyder and Cloitre, 2015). Compared with the classic view of PTSD  
525 development as a process of complex associations (McFarlane, 2010), we propose to consider  
526 human PTSD development as a process with unitary origin. While the core factor in a unitary  
527 model of human PTSD is not necessarily social bonding, we suggest a special focus on  
528 affective bonding as the core factor for patient diagnosed with witnessing PTSD. We also  
529 expect that behavioral signs of PTSD development could be detected in humans already shortly  
530 after the traumatic event. The fine-scale behavioral analyses we introduced here provides a  
531 simple, non-invasive analytic tool to capture informative behavioral details and is not limited  
532 to laboratory animals. It opens a new window for early detection and prediction, with the  
533 potential to prevent the development into PTSD.

534

### 535 **Limitations of the Study**

536 Although we have conducted an in-depth investigation covering multiple dimensions  
537 of behavioral phenotype, our tests and paradigms only focus on a small part of all the  
538 possibilities of an animal facing the great uncertainty in nature and achieving countless tasks  
539 through its live. In addition, since our data did not replicate common findings of social



540 avoidance followed by social defeat stress, a “dose response” of observational stress could  
541 govern this “micro-defeat” which did not result in a “standard constellation” of PTSD-like  
542 behaviors in mice. Finally, individual performance across different tests and the corresponding  
543 cross-testing measurement effects on stress development, as a factor may be prone to  
544 systematic errors, was ruled out from our study design and not examined.

545

## 546 **Materials and Methods**

547 All animal experiments were approved by the Institutional Animal Care and Use  
548 Committee (IACUC) in the animal facility at the Okinawa Institute of Science and Technology  
549 (OIST) Graduate University, accredited by the Association for Assessment and Accreditation  
550 of Laboratory Animal Care (AAALAC). All animal procedures were conducted in accordance  
551 with guidelines of the OIST IACUC in the AAALAC-accredited facility.

### 552 ***Study design***

553 The goal of this work is to identify diverse psychological aspects, temporal patterns,  
554 and associations of behavioral development in mice after a single trauma induction. Pre-  
555 specified hypotheses stated that (i) development of behavioral differences is already  
556 represented in behavioral details during the early post-traumatic phase, while (ii) the behavioral  
557 differences of spontaneous behaviors and social interactions are inter-dependent. Our data  
558 support the first pre-specified hypothesis, but not the second. All other hypotheses were  
559 suggested after initiation of the data analyses.

560 We approached the research goal by developing a novel mouse model of psychosocial  
561 trauma under highly controlled conditions (psychosocial manipulations, subjective experiences,  
562 and genetic background) and by applying fine-scale analysis to standard behavioral tests. To  
563 induce acute witnessing trauma, a pair-housed mouse observed how its partner got bullied by  
564 a larger, aggressive mouse on the day of trauma induction. After this trauma, the observer  
565 mouse was isolated and developed behavioral differences compared to control mice in the  
566 ensuing weeks. The control groups included (i) mice isolated without experiencing trauma  
567 induction, (ii) mice isolated after observing how a stranger mouse got bullied by a larger,  
568 aggressive mouse, (iii) mice isolated after exposed to a non-aggressive stranger mouse, (iv)  
569 mice which were pair-housed with their defeat partners after observing how its partner got  
570 bullied by a larger, aggressive mouse, (v) mice which were pair-housed with strangers after  
571 observing how its partner got bullied by a larger, aggressive mouse, (vi) mice isolated with  
572 their environment enriched, and (vii) mice isolated with daily injections of fluoxetine. The

573 behavioral tests included the light-dark box test, elevated plus-maze test, open field test,  
574 locomotor activity test, active social contact test to a female stranger, active social contact test  
575 to a male stranger, and partner-revisiting test. The non-behavioral tests included the body mass  
576 measurement, nest wall height measurement, baseline corticosterone concentration test, and *ex*  
577 *vivo* diffusion tensor imaging.

578 No statistical methods were used to predetermine sample sizes. Animal numbers were  
579 determined based on previous studies (Takahashi et al., 2015). 8-week-old male C57BL/6J  
580 mice, 16-week-old female C57BL/6J mice, and 20-week-old or older male Slc:ICR mice were  
581 used. No data were excluded. No outliers were defined. Mice were from different litters.  
582 Mice were randomly paired. A focal mouse was randomly selected from each pair of mice.  
583 Mice were randomly allocated into experimental groups. Testing order among groups was  
584 counterbalanced. Strangers and aggressors were randomly assigned. All behavioral tests were  
585 conducted in quintuplicate to octuplicate sampling replicates. All behavioral tests were  
586 conducted in single to quadrupole experimental cohorts. All other records were conducted in  
587 quadruplicate to septuplicate experimental cohorts. The investigator was blinded to behavioral  
588 outcomes but not to group allocation during data collection and/or analysis.

589 The endpoints were prospectively selected. Partner mice were expected to get minor  
590 injuries from aggressor mice during aggressive encounters; typically, attack bites on the dorsal  
591 side of posterior trunk (Takahashi et al., 2015). The aggressive encounter and all further  
592 experiments were terminated once (i) the partner mouse showed severe bleeding or ataxia, or  
593 (ii) the aggressor mice showed abnormal attack bites on any other body part. Partner mice  
594 fulfilling criteria (i) were euthanized. Aggressor mice fulfilling criteria (ii) were not used in  
595 any further experiments. If any aggressive sign (sideways threat, tail rattle, pursuit, and attack  
596 bite) was shown by the partner mouse, all further experiments with the partner mouse,  
597 aggressor mouse, and observer mouse were terminated.

## 598 **Overview**

599 In total, 527 male C57BL/6J mice (CLEA Japan, Inc.), 49 female C57BL/6J mice  
600 (CLEA Japan, Inc.), and 33 male Slc:ICR mice (Japan SLC, Inc.; retired from used for breeding)  
601 were used in this study. In CLEA Japan, nursing females were individually housed (CL-0103-  
602 2; 165×234×118 mm), while pups were separated on P21 according to gender and housed ≤15  
603 mice per cage (CL-0104-2; 206×317×125 mm). Pups were re-arranged on P28 according to  
604 their weights and housed ≤13 mice per cage (CL-0104-2). Mice were shipped in boxes each  
605 with 10 – 30 mice to the OIST Animal Facility. In the OIST Animal Facility, mice were housed  
606 in 380×180×160-mm transparent holding cages (Sealsafe Plus Mouse DGM - Digital Ready

607 IVC; Tecniplast Inc., Quebec, Canada) bedded with 100% pulp (FUJ9298101; Oriental Yeast  
608 Co., Ltd., Tokyo, Japan) under a 12-hr dark/light cycle (350-lux white light) at a controlled  
609 temperature of 22.7 – 22.9 °C, humidity of 51 – 53%, and differential pressure of -14 – -8 Pa  
610 with food and water available ad libitum. Circadian time (CT) is defined to start at mid-light  
611 period and described in a 24-hr format, i.e. light off at CT 6:00.

612 The experimenter and caretakers wore laboratory jumpsuits, lab boots, latex gloves,  
613 face masks, and hair nets when handling mice and performing experiments. Handling of mice  
614 during the dark cycle was done under dim red light and mice were transported in a lightproof  
615 carrier within the animal facility. For mice in experimental and control groups tested on the  
616 same dates, the testing order was alternated. Surfaces of experimental apparatuses were wiped  
617 with 70% ethanol in water and dry paper tissues after testing each mouse to remove olfactory  
618 cues. Each mouse was only used for one behavioral test (in total 4 records with intervals of 6  
619 – 21 days) to avoid confounded results due to cross-testing and to minimize measurement  
620 effects on its psychological development (Krishnan et al., 2007).

#### 621 ***Pre-traumatic period (Day-21 to Day0)***

622 To establish partnerships between mice, a male C57BL/6J mouse (focal mouse; 8 weeks)  
623 was pair-housed with another male C57BL/6J mouse (partner mouse; 8 weeks) for 3 weeks  
624 (Day-21 to Day0, with trauma induction on Day0). The partner was initially marked by ear  
625 punching. The holding cage was replaced once per week, with the last change 3 days before  
626 the traumatic event (Day-3).

627 To establish the territory of an aggressor mouse in its homecage, an Slc:ICR mouse  
628 (aggressor mouse;  $\geq 20$  weeks) was pair-housed with a female C57BL/6J mouse (female mouse;  
629 16 weeks) for 3 weeks (Day-21 to Day0). The holding cage was replaced with a clean one  
630 once a week, with the last change one week before the traumatic event (Day-7).

631 Aggression level of aggressors was screened on Days -5, -3, -1 through intruder  
632 encounters (Miczek and O'Donnell, 1978) toward different screening mice to determine  
633 appropriate aggressors to be used for trauma induction on Day0. Aggression screening was  
634 carried out in the behavior testing room at 22.4 – 23.0 °C, 53 – 58% humidity, -4 – -3 Pa  
635 differential pressure, and 57.1 dB(C) ambient noise level during the light period (CT 4:00 –  
636 6:00) with 350-lux white light. After the female and pups with the aggressor were taken out of  
637 their homecage and kept in a clean holding cage in the behavior testing room, a 3-min  
638 aggression screening was started after a male C57BL/6J mouse (screening mouse; 10 weeks)  
639 was brought into the homecage of the aggressor, followed by covering the cage with a

640 transparent acrylic lid. During screening, the aggressor freely interacted with the screening  
641 mouse. The aggressor was brought back to the holding room after the screening mouse was  
642 taken away from the aggressor's homecage and the female and pups were brought back to its  
643 homecage right after screening. Aggressors were selected for trauma induction on Day0 if they  
644 showed biting attacks on all of these screening days and the latencies to the initial bites on Day-  
645 3 and Day-1 were less than 20 s.

### 646 ***Trauma induction (Day0)***

647 The following experimental assay emotionally introduced an acute traumatic  
648 experience in mice through a social process. The setup was the aggressor's homecage, divided  
649 into an 80×180-mm auditorium zone and a 300×180-mm battle arena by the insertion of a  
650 stainless-steel mash with 8×8-mm lattices. The cage was covered with a transparent acrylic  
651 lid. The behavioral procedure was carried out in the behavior testing room during CT 4:00 –  
652 6:00, with 3 – 5 experiments done in parallel.

653 After the female and pups with the aggressor were taken out of their homecage, a  
654 divider was inserted into the aggressor's homecage, allowing the aggressor to freely behave in  
655 the battle arena, but not to enter the auditorium zone. A 5-min aggression encounter session  
656 started after the focal mouse was brought to the auditorium zone and its partner to the battle  
657 arena. Tail rattling counts of the focal mouse during aggressive encounter were recorded by  
658 experimenter. The aggressive encounter session was followed by a 5-min stress infiltration  
659 session, in which the partner was brought to the focal mouse in the auditorium zone, while the  
660 aggressor remained in the battle arena. Right after the stress infiltration session, both focal  
661 mouse and its partner were brought back to their homecage in the behavior testing room for a  
662 10-min resting period. The procedure was repeated 5 times with different aggressors. During  
663 each resting session, the aggressor stayed in its homecage without the divider before its next  
664 intruder encounter. Each aggressor had 3 – 5 encounters with resting periods of 10 – 30 min.  
665 After the 5<sup>th</sup> aggression encounter session, the focal mouse was placed back in its homecage  
666 where the nest had been razed, and brought back to the holding room. Partners from different  
667 pairs were brought to a new holding cage and housed in groups of 3 – 5 per cage. Right after  
668 the last intruder encounter for each aggressor, the female and pups were brought back to the  
669 homecage and returned to the holding room together with the aggressor.

### 670 ***Post-traumatic period (Day0 to Day28)***

671 To investigate the behavior of focal mice after trauma induction (now called ParObsIso  
672 mice, Figure 2A), they were housed individually for 4 weeks after the procedure (Day0 to

673 Day28). No environmental enrichment was provided, except to the ParObsIsoEE mice, and  
674 the holding cage was not changed during social isolation.

### 675 *Control experiments*

676 To differentiate behavioral consequences of the emotionally traumatic experience from  
677 consequences of social isolation, a control group of mice had their partners taken away and  
678 their nests razed during body weighing on Day0 without trauma induction (xScenIso mice,  
679 Figure 1B).

680 To examine the potential reversal effects of social support on the emotionally traumatic  
681 experience, a control group of mice was kept pair-housed with their attacked partners after  
682 trauma induction (ParObsParPH mice, Figure 1C).

683 To characterize potential reversal effects through environmental factors besides social  
684 factors, a control group of mice was housed individually with environmental enrichment,  
685 provided with a pair of InnoDome™ and InnoWheel™ (Bio-Serv, Inc., Flemington, NJ, USA)  
686 and a Gummy Bone (Petite, Green; Bio-Serv, Inc.), after trauma induction (ParObsIsoEE mice,  
687 Figure 1D).

688 To demonstrate predictive validity of potential treatment on stress by an antidepressant,  
689 a control group of mice was intraperitoneally injected with fluoxetine (2 µl/g of 10 mg/ml  
690 fluoxetine hydrochloride dissolved in saline, i.e. 20 mg/kg; F132-50MG; Sigma-Aldrich, Inc.,  
691 Saint Louis, MO, USA) once per day at CT 1:00 – 2:00 after trauma induction (ParObsIsoFLX  
692 mice, Figure 1E).

693 To further test the critical component of social relationship in the potential social  
694 support reversal, a control group of mice was kept pair-housed but with a stranger mouse after  
695 trauma induction (ParObsStrPH mice, Figure 1F).

696 To identify the impacts of aggression during trauma induction, a control group of mice  
697 experienced exposure to strangers of the same strain, gender, and age, instead of the aggressor  
698 mice for trauma induction (xAggrExpIso mice, Figure 1G).

699 To test the influence of social relationship on the emotionally traumatic experience, a  
700 control group of mice witnessed the traumatic events toward stranger mice of the same strain,  
701 gender, and age instead (StrObsIso mice, Figure 1H). In each iteration of the aggression  
702 encounter, stress infiltration, and resting period, a different stranger mouse was presented.

703 To identify anxiety-like spontaneous behaviors putatively induced by somatic  
704 uncertainty, a group of mice was initially sedated with 3%v/v isoflurane in oxygen and then

705 intraperitoneally injected with caffeine (20  $\mu$ l/g of 0.75 mg/ml anhydrous caffeine dissolved in  
706 saline, i.e. 15 mg/kg; 06712-55; Nacalai Tesque, Inc., Kyoto, Japan). Recording of  
707 spontaneous behaviors were started 30 min after the injections.

708 To identify anxiety-like spontaneous behaviors putatively induced by cognitive  
709 uncertainty, a group of mice was initially sedated with 3%v/v isoflurane in oxygen and then  
710 intraperitoneally injected with 2  $\mu$ l/g saline. The mice received a series of foot shocks (1 mA  
711 for 1 s, 6 times in 5 min, i.e. once every 50 s for the first started at 49 s after placed in the  
712 chamber; single chamber system; O'Hara & Co., Ltd., Tokyo, Japan) 25 min after the injections.  
713 Recording of spontaneous behaviors were started 30 min after the injections.

714 To identify non-treated-like spontaneous behaviors, a control group of mice was  
715 initially sedated with 3%v/v isoflurane in oxygen and then intraperitoneally injected with 2  
716  $\mu$ l/g saline. Recording of spontaneous behaviors were started 30 min after the injections.

### 717 ***Body mass and nest wall height***

718 In the holding room, body masses of all individuals were recorded on Days -7, 0, 1, 7,  
719 28, while the heights of nest walls built by each individual were recorded on Days 1, 7, 28.  
720 The height of the nest wall was measured with 5-mm resolution using a transparent acrylic  
721 ruler, while the mouse was weighed with 10-mg resolution on a balance. Mice were placed  
722 back in their homecages right after recording.

### 723 ***Light-dark box test***

724 The light-dark box test is an experimental assay to measure anxiety in rodents (Crawley  
725 and Goodwin, 1980), designed to evaluate their natural aversion to brightly lit areas against  
726 their temptation to explore. The light-dark box setup consisted of two connected 200 $\times$ 200 $\times$ 250-  
727 mm non-transparent PVC boxes, separated by a wall with a 50 $\times$ 30-mm door. The boxes were  
728 covered with lids with white and infrared LED light illumination for the light and dark areas,  
729 respectively, and CCD cameras in the centers (4-chamber system; O'Hara & Co., Ltd., Tokyo,  
730 Japan). The floors of the boxes were white, while the walls of the boxes were white for the  
731 light area and black for the dark area. Uniform illumination in the light area was 550 lux.  
732 Behavioral tests were carried out on Days -7, 1, 7, and 28 in the behavior testing room at 22.7  
733 – 23.0 °C, 51 – 54% humidity, -11 – -9 Pa differential pressure, and 53.6 dB(C) ambient noise  
734 level during dark period (CT 6:00 – 8:00).

735 After habituation for 10 min individually in the homecage in the behavior testing room  
736 in darkness, the focal mouse was transferred to the dark area through a 50 $\times$ 50-mm side door.  
737 A 5-min behavior record was started right after the side door of dark area was closed and the

738 door between light and dark areas was opened. Locomotion was recorded 2-dimensionally at  
739 15 Hz from top-view with CCD video cameras. Right after recording, the mouse was returned  
740 to its homecage, and brought back to the holding room.

#### 741 ***Elevated plus-maze test***

742 The elevated plus-maze test is an experimental assay to measure anxiety in rodents  
743 (Pellow et al., 1985), designed to evaluate their natural fear of falling and exposure against  
744 their temptation to explore. The elevated plus-maze setup consisted of a gray PVC platform  
745 raised 500 mm above the ground (single maze system; O'Hara & Co., Ltd.). The platform was  
746 composed of a 50×50-mm square central platform, two opposing 50×250-mm open arms, and  
747 two opposing 50×250-mm closed arms with 150-mm semi-transparent walls. Each of the two  
748 open arms emanated at 90° to each of the two closed arms, and vice versa. The apparatus was  
749 installed in a soundproof box with white fluorescent lamp illumination (20 lux) and ventilators.  
750 Behavioral tests were carried out on Days -7, 1, 7, 28 in the behavior testing room at 22.8 –  
751 23.0 °C, 53 – 56% humidity, -13 – -11 Pa differential pressure, and 52.1 dB(C) ambient noise  
752 level during dark period (CT 8:00 – 10:00).

753 After habituation for 10 min individually in the homecage in the behavior testing room  
754 in darkness, the focal mouse was brought to the central platform of the elevated plus-maze,  
755 facing the open arm on the opposite side from the door of the soundproof box. A 5-min  
756 behavior recording was started right after the door of the soundproof box was closed.  
757 Locomotion was recorded 2-dimensionally at 15 Hz from top-view with a CCD video camera  
758 installed above the center of the central platform. Delineated entrances to open and closed  
759 arms were defined at 50 mm from the center of the central platform. Right after recording, the  
760 mouse was placed back in its homecage, and brought back to the holding room.

#### 761 ***Open field test***

762 The open field test is an experimental assay to measure anxiety in rodents (Hall and  
763 Ballachey, 1932), designed to evaluate their spontaneous activity under a gradient of spatial  
764 uncertainty (high in the field center and low along the walls and at the corners of the field). The  
765 open field setup consisted of a 400×400×300-mm non-transparent gray PVC box with no cover,  
766 installed in a soundproof box with white LED light illumination and ventilators (2-chamber  
767 system; O'Hara & Co., Ltd.). Behavioral tests were carried out on Days -7, 1, 7, 28 in the  
768 behavior testing room at 22.8 – 23.0 °C, 53 – 56% humidity, -13 – -11 Pa differential pressure,  
769 and 56.7 dB(C) ambient noise level during dark period (CT 8:00 – 10:00).

770 After habituation for 10 min individually in the homecage in the behavior testing room  
771 in darkness, the focal mouse was brought to the center of the open field arena under 20-lux  
772 uniform illumination, facing the wall on the opposite side from the door of the soundproof box.  
773 A 5-min behavior recording was started right after the door of the soundproof box was closed.  
774 Locomotion was recorded 2-dimensionally at 15 Hz from top-view with a CCD video camera  
775 installed above the center of the open field arena. Vertical activity of exploratory rearing  
776 behavior was recorded by the blocking of invisible infrared beams created and detected by  
777 photocell emitters and receptors, respectively, positioned 60 mm high on the walls of the open  
778 field box. A delineated center region was defined as the central 220×220 mm area. Right after  
779 recording, the mouse was placed back in its homecage, and returned to the holding room.

#### 780 ***Locomotor activity test***

781 The locomotor activity test is an experimental assay to measure spontaneous activity of  
782 rodents in an environment without an experimentally designed stressor. The locomotor activity  
783 setup consisted of a 200×200×250 mm non-transparent covered PVC box with infrared LED  
784 illumination and a CCD camera in the center (the dark area of the light-dark box setup, while  
785 the door between the light and dark areas was closed and fixed). The floor of the box was  
786 embedded with bedding material from the homecage of the focal mouse, while the walls of the  
787 box were black. Behavioral test was carried out on Days -7, 1, 7, 28 in the behavior testing  
788 room at 22.7 – 23.0 °C, 51 – 54% humidity, -11 – -9 Pa differential pressure, and 53.6 dB(C)  
789 ambient noise level during dark period (CT 6:00 – 8:00).

790 After habituation for 30 min individually in the behavior testing box, a 1-hr behavior  
791 recording was started. The behavior testing box was not covered completely in order to allow  
792 air circulation. Locomotion was recorded 2-dimensionally at 15 Hz from top-view with the  
793 CCD video camera. Right after recording, the mouse was returned to its homecage, and  
794 brought back to the holding room.

#### 795 ***Active social contact test***

796 The active social contact test [also known as "social interaction test", but to be  
797 distinguished with the one-session test using an open field with a social target freely behaving  
798 in the field (Arakawa et al., 2014) or the one-session test placing a social target-containing  
799 cylinder into the center of the testing subject's homecage for social instigation (Tsuda and  
800 Ogawa, 2012)] is a 2-session experimental assay to measure social motivation in rodents  
801 (Berton et al., 2006). The setup consists of a 400×400×300-mm non-transparent gray PVC box  
802 with no cover, installed in a soundproof box with 20-lux white LED illumination and ventilators.



803 A 60×100×300-mm stainless-steel chamber with wire grid sides was placed in the center of the  
804 wall on the opposite side from the door of the soundproof box. The wire grid had 8×8 mm  
805 lattices at a height of 10 – 60 mm from the bottom. An ultrasound microphone (CM16/CPMA;  
806 Avisoft Bioacoustics, Glienicke, Germany) with an acoustic recording system (UltraSoundGate;  
807 Avisoft Bioacoustics) was hung outside the chamber, 100 mm above the ground. Behavioral  
808 tests were carried out on Days -7, 1, 7, 28 in the behavior testing room at 22.8 – 23.0 °C, 53 –  
809 56% humidity, -13 – -11 Pa differential pressure, and 56.7 dB(C) ambient noise level during  
810 dark period (CT 8:00 – 10:00).

811 The social target used for active social contact tests was either a male or a female  
812 C57BL/6J mouse (18 weeks), pair-housed with a partner of the same strain, gender, and age  
813 for more than 2 weeks before the tests. The social target was adapted to the experimental  
814 protocol one day before the tests in the behavior testing room during dark period (CT 8:00 –  
815 9:00): After habituation for 5 min individually in the homecage in the soundproof box under  
816 20-lux uniform illumination, the social target was brought into the chamber in the open field  
817 arena under 20 lux uniform illumination. A male C57BL/6J mouse (11–16 weeks; from  
818 partners of xScenIso mice in previous experiment) was then brought to the open field arena for  
819 a 2.5-min spontaneous exploration and interaction with the social target. The social target was  
820 then brought back to its homecage in the soundproof box under 20-lux uniform light for a 5-  
821 min rest. The social interaction procedure was repeated with a different male C57BL/6J mouse  
822 right afterward. After the social target had interacted with 4 different mice, it was returned to  
823 its homecage and brought back to the holding room.

824 On testing days, after 10-min habituation individually in its homecage in the behavior  
825 testing room in darkness, the first session of the active social contact test started by placing the  
826 focal mouse at the center of the open field arena under 20-lux uniform light, facing the empty  
827 chamber. A 2.5-min behavior recording started right after the door of the soundproof box was  
828 closed. Locomotion was recorded 2-dimensionally at 15 Hz from top-view with a CCD video  
829 camera installed above the center of the open field arena. Ultrasonic vocalization was recorded  
830 at 250 kHz. In the second session of the active social contact test, which followed the first  
831 session, the social target was brought into the chamber. Another 2.5-min behavior recording  
832 started as soon as the door of the soundproof box was closed. Right afterward, the focal mouse  
833 was returned to its homecage and brought back to the holding room.

834 The focal mouse experienced active social contact tests with different social targets on  
835 different recording days (Days -7, 1, 7, 28), while different focal mice were tested with the  
836 same social target on the same recording day (5 – 10 records). The social target remained in

837 its homecage in a soundproof box under 20-lux uniform illumination before and between each  
838 test. A delineated interaction zone was taken as the region within 80 mm of the edges of the  
839 chamber. Social approaches of the focal mouse poking its nose toward the social target were  
840 recorded manually using the event recording software, tanaMove ver0.09 ([http://www.mgrl-](http://www.mgrl-lab.jp/tanaMove.html)  
841 [lab.jp/tanaMove.html](http://www.mgrl-lab.jp/tanaMove.html)).

#### 842 ***Partner-revisiting test***

843 The partner-revisiting test is a memory-based experimental assay to measure social  
844 bonding in rodents [sharing similar concept of “familiar *v.s.* novel social target recognition”,  
845 but to be distinguished with the three-chamber paradigm test (Nadler et al., 2004)]. The  
846 partner-revisiting setup was the uncovered homecage of the focal mouse, installed in a  
847 soundproof box with white LED illumination and ventilators (O'Hara & Co., Ltd., Tokyo,  
848 Japan). The long sides of the homecage were parallel to the door of soundproof box. The  
849 partner-revisiting test was carried out on Day28 in the behavior testing room at 22.8 – 23.0 °C,  
850 53 – 56% humidity, -13 – -11 Pa differential pressure, and 56.7 dB(C) ambient noise level  
851 during light period (CT 4:00 – 6:00) with 350-lux light intensity.

852 The previously separated partner of the focal mouse, being a social target in the test,  
853 was initially sedated with 3%v/v isoflurane in oxygen, and then anesthetized by intraperitoneal  
854 (i.p.) injection of a mixture of medetomidine (domitor, 3%v/v in saline, 0.3 mg/kg), midazolam  
855 (dormicum, 8%v/v in saline, 4 mg/kg), and butorphanol (vetorphale, 10%v/v in saline, 5 mg/kg).  
856 Also, a stranger mouse (15 weeks; a separated partner of a ParObsIso or Buffered mouse for  
857 testing a xScenIso, StrObsIso, or xAggrExpIso mouse, and *vice versa*) was anesthetized as an  
858 alternative social target. Both anesthetized mice were kept on a heating pad at 34°C  
859 (B00O5X4LQ2; GEX Co., Ltd., Osaka, Japan) to maintain their body temperatures before the  
860 test.

861 The focal mouse was brought to a clean, uncovered holding cage in the soundproof box  
862 under 50-lux uniform illumination for 5-min habituation, while its homecage was placed in  
863 another soundproof box under 50-lux uniform light. During habituation of the focal mouse,  
864 the anesthetized social targets were injected with atipamezole hydrochloride (antisedan; 6%v/v  
865 in saline for 0.3 mg/kg, i.p.) to induce recovery from anesthesia. During the waking-up period,  
866 the social targets were still immobilized and not able to actively interact with the focal mouse  
867 during the following recording, but showed enough social cues to be attractive for the focal  
868 mouse. The immobilized social targets were then placed in the homecage of the focal mouse  
869 with their nose pointing toward the center of the short side of the wall (10 mm of nose-to-wall  
870 distance) with their bellies facing the door of the soundproof box. After habituation, the focal

871 mouse was brought to the center of its homecage, facing the long side of the homecage wall on  
872 the opposite side from the door of soundproof box. A 10-min behavior record started right  
873 after the door of the soundproof box was closed. Locomotion was recorded 2-dimensionally  
874 at 15 Hz from top-view with a CCD video camera installed above the center of the homecage.  
875 Right after recording, social targets were taken out of the focal mouse's homecage and the focal  
876 mouse was brought back to the holding room.

877 Social contacts including sniffing, allogrooming, and pushing of the focal mouse  
878 toward each of the social targets were recorded manually using the event recording software,  
879 tanaMove ver0.09 (<http://www.mgrl-lab.jp/tanaMove.html>).

### 880 ***Baseline plasma corticosterone concentration test***

881 The baseline plasma corticosterone (CORT) concentration test is a competitive-  
882 inhibition enzyme-linked immunosorbent assay (ELISA) to measure physiological stress level  
883 in rodents, designed to quantitatively determinate CORT concentrations in blood plasma. The  
884 sample collection was carried out on Days -7, 1, 7, 28 in the behavior testing room at 22.4 –  
885 23.0 °C, 53 – 58% humidity, -4 – -3 Pa differential pressure, and 57.1 dB(C) ambient noise  
886 level during CT 4:00 – 6:00 with 350-lux white light.

887 After habituation for 30 min individually in the homecage in the behavior testing room,  
888 the mouse was initially sedated with 3%v/v isoflurane in oxygen. Six drops of blood from the  
889 facial vein pricked by a 18G needle were collected in a EDTA-lined tube [K2 EDTA (K2E)  
890 Plus Blood Collection Tubes, BD Vacutainer; Becton, Dickinson and Company (BD), Franklin  
891 Lakes, NJ, USA] and kept on ice. Right after collection, the mouse was returned to its  
892 homecage, and brought back to the holding room. Whole blood samples were then centrifuged  
893 (MX-300; Tomy Seiko Co., Ltd., Tokyo, Japan) at 3,000 rpm for 15 min at 4°C. Plasma  
894 supernatant was decanted and kept at -80°C until the measurement on Day 29.

895 CORT concentrations in blood plasma were tested with Mouse Corticosterone (CORT)  
896 ELISA Kit (MBS703441, 96-Strip-Wells; MyBioSource, Inc., San Diego, USA; stored at 4°C  
897 before use) on Day 29. All reagents [assay plate (96 wells, pre-coated with goat-anti-rabbit  
898 antibody), standards (0, 0.1, 0.4, 1.6, 5, and 20 ng/ml of CORT), rabbit-anti-CORT antibody,  
899 HRP-conjugated CORT, concentrated wash buffer (20x phosphate-buffered saline (PBS)),  
900 3,3',5,5'-tetramethylbenzidine (TMB) color developing agent (substrates A and B), and TMB  
901 stop solution] and samples were brought to room temperature for 30 min before use. Collected  
902 plasma samples after thawing were centrifuged again (MX-300; Tomy Seiko Co.) at 3,000 rpm  
903 for 15 min at 4°C. 20 µl of standard or sample was added per well, assayed in duplicate, with

904 blank wells set without any solution. After 20  $\mu$ l of HRP-conjugated CORT was added to each  
905 well except to the blank wells, 20  $\mu$ l of rabbit-anti-CORT antibody was added to each well and  
906 mixed. After incubation for 1 hour at 37°C, each well was aspirated and washed, repeated for  
907 3 times, by filling each well with 200  $\mu$ l of wash buffer (diluted to 1x PBS) using a squirt bottle,  
908 standing for 10 s, and completely removing liquid at each step. After the last wash and the  
909 removal of any remaining wash buffer by decanting, the plate was inverted and blotted against  
910 clean paper towels. After TMB color developing agent (20  $\mu$ l of substrate A and 20  $\mu$ l of  
911 substrate B) was added to each well, mixed, and incubated for 15 min at 37°C in dark, 20  $\mu$ l of  
912 TMB stop solution was added to each well and mixed by gently tapping the plate. The optical  
913 density (O.D.) of each well was determined, within 10 min, using a microplate reader  
914 (Multiskan GO; Thermo Fisher Scientific, Inc., Waltham, MA, USA) measuring absorbance at  
915 450 nm, with correction wavelength set at 600–630 nm.

916 CORT concentrations were calculated from the O.D. results using custom scripts  
917 written in MATLAB R2015b (MathWorks). The duplicate O.D. readings for each standard and  
918 sample was averaged and subtracted the average O.D. of the blanks,  $X = \langle O.D. \rangle -$   
919  $\langle O.D. \rangle_{blank}$ . A standard curve was determined by a four parameter logistic (4PL) regression  
920 fitting the equation  $\rho_{CORT}(X_{standard}) = d + \frac{a-d}{1+(\frac{X_{standard}}{c})^b}$ , where  $\rho_{CORT}$  is the CORT  
921 concentration,  $a$  is the minimum asymptote,  $b$  is the Hill's slope,  $c$  is the inflection point, and  
922  $d$  is the maximum asymptote. CORT concentrations of the samples were calculated from the  
923 fitted 4PL equation with respect to  $X_{sample}$ .

#### 924 ***Ex vivo diffusion tensor imaging***

925 *Ex vivo* diffusion tensor imaging (DTI) is a magnetic resonance imaging (MRI)  
926 technique to determinate structural information about tissues (Basser et al., 1994), designed to  
927 measure the restricted diffusion of water in tissue. The sample collection was carried out on  
928 Day 28 in the necropsy room at 22.4 - 22.5 °C, 53 - 54 % humidity, and 10 - 12 Pa differential  
929 pressure during CT 4:00 - 6:00 with 750-lux white light.

930 After mice were brought individually in their homecages to the necropsy room, they  
931 were initially sedated with 3%v/v isoflurane in oxygen, then deeply anaesthetized with a  
932 ketamine-xylazine mixture (>30  $\mu$ l/g body weight of 100 mg/ml ketamine and 20 mg/ml  
933 xylazine), and perfused transcardially. The perfusates, in a two-step procedure, were (i) 20 ml  
934 of ice cold 1x phosphate-buffered saline (PBS), and (ii) 20 ml of ice cold 4% paraformaldehyde,  
935 0.2% sodium meta-periodate, and 1.4% lysine in PBS. Mouse skull including the brain was  
936 removed and stored in the perfusate (ii) at 4 °C for 2 weeks. Each skull with the brain was then

937 transferred into 2 mM gadolinium with diethylenetriaminepentaacetic acid (Gd-DTPA) and  
938 0.5% azide in PBS for 2 weeks.

939 Isolated fixed brains within the skulls were positioned in an acrylic tube filled with  
940 fluorinert (Sumitomo 3M Ltd., Tokyo, Japan) to minimize the signal intensity attributable to  
941 the medium surrounding the brain during MRI scanning. All MRI was performed with an 11.7-  
942 T MRI system (BioSpec 117/11; Bruker Biospec, Ettlingen, Germany) using ParaVision 6.0.1  
943 software (Bruker Biospec, Ettlingen, Germany) for data acquisition. The inner diameter of the  
944 integrated transmitting and receiving coil (Bruker Biospec, Ettlingen, Germany) was 35 mm  
945 for the ex vivo MRI. DTI data were acquired by using a 3-D diffusion-weighted spin-echo  
946 imaging sequence, with repetition time (TR) = 267 ms, echo time (TE) = 18.5 ms, b-value =  
947 2,000 s/mm<sup>2</sup>, and 30 non-collinear directions. Five T2-weighted measurements were acquired  
948 together with DTI, for one every 6 diffusion measurements. The acquisition matrix was  
949 216×216×168 over a 27.0×27.0×21.0 mm<sup>3</sup> field of view, resulting in a native isotropic image  
950 resolution of 125 μm. Total acquisition time was 96 hr.

951 MRI data was processed using custom scripts written in MATLAB R2015b  
952 (MathWorks). All 30 DTI and 5 T2 3-D images were masked by thresholding at the half of  
953 mean values of diffusion weights for each voxel and omitting clusters smaller than 10 voxels.  
954 After diffusion tensor of each voxel was estimated by solving the Stejskal-Tanner equation  
955 through linear regression (Hrabe et al., 2007), the 3 eigenvalues ( $\lambda_1$ ,  $\lambda_2$ , and  $\lambda_3$ ) with respect  
956 to the 3 axes of the diffusion ellipsoid (the longest, middle, and shortest axes, respectively)  
957 were calculated by eigenvalue decomposition of the diffusion tensor. Four focused DTI-based  
958 measures (Mori, 2007) are the mean diffusivity (MD) that represents membrane density

959 
$$MD = \langle \lambda \rangle = \frac{\lambda_1 + \lambda_2 + \lambda_3}{3},$$

960 axial diffusivity (AD) that represents neurite organization

961 
$$AD = \lambda_1,$$

962 radial diffusivity (RD) that represents myelination

963 
$$RD = \frac{\lambda_2 + \lambda_3}{2},$$

964 and fractional anisotropy (FA) that represents average microstructural integrity

965 
$$FA = \sqrt{\frac{3 \times [(\lambda_1 - \langle \lambda \rangle)^2 + (\lambda_2 - \langle \lambda \rangle)^2 + (\lambda_3 - \langle \lambda \rangle)^2]}{2 \times (\lambda_1^2 + \lambda_2^2 + \lambda_3^2)}}.$$

966 After the registration of these 3-D DTI-based brain maps to a template brain atlas  
967 (DSURQE Atlas; <https://wiki.mouseimaging.ca/display/MICePub/Mouse+Brain+Atlases>),  
968 mean values of these DTI-based quantities were identified in a total of 244 brain regions (\$)   
969 for each individual. Based on the FA maps, DTI-based long-range fiber tracking from a focal  
970 seed region (\$B) was calculated with 2 samplings, distance of forward fiber in one step = 50  
971  $\mu\text{m}$ , and thresholds of minimal fiber length = 750  $\mu\text{m}$ , maximal fiber length = 75,000  $\mu\text{m}$ ,  
972 maximal fiber deviation angle = 57.3°, and minimal FA for keeping tracking = 0.4.

### 973 *Video data processing*

974 Video image data was processed using custom scripts written in MATLAB R2015b  
975 (MathWorks). Each video frame from a recorded AVI video file was read as a 2-dimensional  
976 matrix with an 8-bit gray scale. Each of these matrices was then divided by a background  
977 matrix read from a TIF image file of the background taken before bringing the test mouse to  
978 the setup. The centroid of the area with non-one values in each matrix ratio was taken as the  
979 position of the mouse at this specific time point. Speed was calculated as the distance between  
980 temporally adjacent positions multiplied by 15 (15-Hz recording). Freezing periods were  
981 sorted out if the area of the mouse body between temporally adjacent frames was less than 20  
982  $\text{mm}^2$ .

### 983 *Audio data processing*

984 Audio signal data was processed with custom scripts written in MATLAB R2015b  
985 (MathWorks). Each recorded WAV audio file was read and transformed into a spectrogram  
986 using fast Fourier transform with non-overlapping 0.4-ms time windows. To identify the time  
987 segments with ultrasonic vocalization signals, recordings were thresholded at a power spectral  
988 density (PSD)  $\geq 75$  dB/Hz, and time segments with averaged PSD between 0–50 kHz higher  
989 than that between 50–120 kHz were removed. The duration of remaining time segments was  
990 calculated.

### 991 *Statistical analysis*

992 Numerical data were analyzed with custom scripts written in MATLAB R2015b  
993 (MathWorks). Statistical significance of the difference between 2 mean values was estimated  
994 with two-tailed, two-sample Student's t-test, except of DTI quantities and state-space  
995 behavioral comparison which were estimated with one-tailed, two-sample Student's t-test.  
996 Statistical significance of the difference between 2 median values (vocalization analysis; Figure  
997 8F) was estimated using one-tailed Mann–Whitney U test.

998 To capture fine-scale behavioral details of location within the light-dark box and the  
999 elevated plus-maze (Figures 4 and 5), we computed  $T(x)$ , the cumulative probability of finding  
1000 position  $\leq x$ , for each individual (light traces) for all measured locations (a collection of  
1001 locations from all mice for the statistics). We then show the average across the control group  
1002 (bold blue trace) and the ParObsIso group (bold red trace). We compared the averages of each  
1003 group with a two-tailed, two-sample Student's t-test and plot the resulting p-values, presented  
1004 as  $-\log(p)$ , the negative logarithm of p-values. We also show the box plot (the minimum, lower  
1005 quartile, median, upper quartile, and maximum) of  $-\log(p)$  values collapsed across all measured  
1006 locations. To capture the fine-scale behavioral details of speed, we followed a similar procedure  
1007 as above, but with  $U(v)$ , the cumulative distribution function of finding speed  $\leq v$ .

1008 To estimate local likelihoods of caffeine-injected, foot-shocked, and non-treated  
1009 behavior in the light-dark box or elevated plus-maze tests for any given 4-dimensional  
1010 behavioral states described by the position, speed, velocity along the stressor axis, and  
1011 acceleration strength, we trained a deterministic 3-layer feedforward network with hidden layer  
1012 sizes of 26, 30, and 24 units, respectively, using log-sigmoid transfer functions. For pattern  
1013 recognition, each network was trained by using the scaled conjugate gradient method to  
1014 minimize cross-entropy to obtain reliable classifiers, with a random data division of 80% for  
1015 training and 20% for testing. Training of updating weights and biases terminated when one of  
1016 the following condition was matched: (1) reaching 1,000 iterations, (2) obtaining a perfect data  
1017 fitting [i.e. the mean squared error (MSE) equaled to zero], (3) having the error rate  
1018 continuously increasing for more than 6 epochs, (4) showing the gradient of MSE less than  $10^{-7}$ ,  
1019 and (5) receiving the training gain larger than  $10^{10}$ . The global likelihoods of a recorded  
1020 mouse to be caffeine-injected-like, foot-shocked-like, and non-treated-like were calculated by  
1021 taking the average of local likelihoods of each experimental type estimated by the  
1022 corresponding trained network.

1023 To evaluate the uncertainty of the percentage for each tail rattle count (Figure 10A), we  
1024 created 10,000 bootstrapped data sets where each sample was randomly picked with  
1025 replacement from the original data set. Each bootstrapped data set had the same sample size as  
1026 the original data set. The standard error was taken as the standard deviation of the bootstrapped  
1027 percentages for a tail rattle count. A similar procedure was carried out to evaluate the standard  
1028 error of mean for the percentage of time spent in each behavior in the partner-revisiting test  
1029 (Figures 10H and 11E), where each sample of the bootstrapped data sets was a set of the  
1030 percentages of the three classified behaviors (partner concern, stranger concern, and non-social  
1031 activity/sniffing at social targets) from a mouse record. Standard errors of means for other

1032 results were estimated with the formula  $\sigma/\sqrt{n}$ , where  $\sigma$  is the sample standard deviation and  $n$   
1033 is the sample size.

1034 **Acknowledgments:** We thank Tsuyoshi Koide (NIG, Japan), Aki Takahashi (University of  
1035 Tsukuba), Teruhiro Okuyama (MIT), Charles Yokoyama (RIKEN BSI), Ai Koizumi (CiNet),  
1036 and Tsai-Wen Chen (National Yang-Ming University) for comments, Tadashi Yamamoto  
1037 (OIST) for sharing behavior testing setups, and Steven D. Aird (OIST) for editing the  
1038 manuscript.

1039 **Competing interests:** The authors declare no competing interests.

1040 **Funding:** We acknowledge a JSPS KAKENHI Grant (JP 16J10077) by DC1 Student Research  
1041 Fellowship to R.X.L. and OIST internal funding to B.K. The funders had no role in study  
1042 design, data collection and interpretation, or the decision to submit the work for publication.

1043 **Author contributions:** R.X.L. conceptualized the study, designed the research, performed  
1044 experiments, analyzed data, interpreted results, wrote the original draft, and revised the article;  
1045 G.J.S. advised on data analysis and revised the article; B.K. advised on research design and  
1046 revised the article.

1047

## 1048 **References:**

- 1049 Adams, R.E., Boscarino, J.A., 2006. Predictors of PTSD and Delayed PTSD After Disaster:  
1050 The Impact of Exposure and Psychosocial Resources. *J. Nerv. Ment. Dis.* 194, 485–493.  
1051 <https://doi.org/10.1097/01.nmd.0000228503.95503.e9>
- 1052 Anderson, D.J., 2016. Circuit modules linking internal states and social behaviour in flies and  
1053 mice. *Nat. Rev. Neurosci.* 17, 692–704. <https://doi.org/10.1038/nrn.2016.125>
- 1054 Anderson, D.J., Adolphs, R., 2014. A framework for studying emotions across species. *Cell*  
1055 157, 187–200. <https://doi.org/10.1016/j.cell.2014.03.003>
- 1056 Anderson, D.J., Perona, P., 2014. Toward a Science of Computational Ethology. *Neuron* 84,  
1057 18–31. <https://doi.org/10.1016/j.neuron.2014.09.005>
- 1058 Andrews, B., Brewin, C.R., Philpott, R., Stewart, L., 2007. Delayed-Onset Posttraumatic Stress  
1059 Disorder: A Systematic Review of the Evidence. *Am. J. Psychiatry* 164, 1319–1326.  
1060 <https://doi.org/10.1176/appi.ajp.2007.06091491>
- 1061 Arakawa, T., Tanave, A., Ikeuchi, S., Takahashi, A., Kakihara, S., Kimura, S., Sugimoto, H.,  
1062 Asada, N., Shiroishi, T., Tomihara, K., Tsuchiya, T., Koide, T., 2014. A male-specific  
1063 QTL for social interaction behavior in mice mapped with automated pattern detection by



- 1064 a hidden Markov model incorporated into newly developed freeware. *J. Neurosci.*  
1065 *Methods* 234, 127–134. <https://doi.org/10.1016/J.JNEUMETH.2014.04.012>
- 1066 Archer, J., 1973. Tests for emotionality in rats and mice: A review. *Anim. Behav.* 21, 205–235.  
1067 [https://doi.org/10.1016/S0003-3472\(73\)80065-X](https://doi.org/10.1016/S0003-3472(73)80065-X)
- 1068 Avesar, D., Gullledge, A.T., 2012. Selective serotonergic excitation of callosal projection  
1069 neurons. *Front. Neural Circuits* 6, 12. <https://doi.org/10.3389/fncir.2012.00012>
- 1070 Balogh, S.A., Radcliffe, R.A., Logue, S.F., Wehner, J.M., 2002. Contextual and cued fear  
1071 conditioning in C57BL/6J and DBA/2J mice: Context discrimination and the effects of  
1072 retention interval. *Behav. Neurosci.* 116, 947–957. [https://doi.org/10.1037/0735-](https://doi.org/10.1037/0735-7044.116.6.947)  
1073 [7044.116.6.947](https://doi.org/10.1037/0735-7044.116.6.947)
- 1074 Basser, P.J., Mattiello, J., LeBihan, D., 1994. MR diffusion tensor spectroscopy and imaging.  
1075 *Biophys. J.* 66, 259–267. [https://doi.org/10.1016/S0006-3495\(94\)80775-1](https://doi.org/10.1016/S0006-3495(94)80775-1)
- 1076 Berton, O., McClung, C.A., Dileone, R.J., Krishnan, V., Renthal, W., Russo, S.J., Graham, D.,  
1077 Tsankova, N.M., Bolanos, C.A., Rios, M., Monteggia, L.M., Self, D.W., Nestler, E.J.,  
1078 2006. Essential role of BDNF in the mesolimbic dopamine pathway in social defeat stress.  
1079 *Science* 311, 864–8. <https://doi.org/10.1126/science.1120972>
- 1080 Bolton, S., Robinson, O.J., 2017. The impact of threat of shock-induced anxiety on memory  
1081 encoding and retrieval. *Learn. Mem.* 24, 532–542. <https://doi.org/10.1101/lm.045187.117>
- 1082 Borsini, F., Podhorna, J., Marazziti, D., 2002. Do animal models of anxiety predict anxiolytic-  
1083 like effects of antidepressants? *Psychopharmacology (Berl.)* 163, 121–141.  
1084 <https://doi.org/10.1007/s00213-002-1155-6>
- 1085 Bremner, J.D., Mletzko, T., Welter, S., Quinn, S., Williams, C., Brummer, M., Siddiq, S., Reed,  
1086 L., Heim, C.M., Nemeroff, C.B., 2005. Effects of phenytoin on memory, cognition and  
1087 brain structure in post-traumatic stress disorder: a pilot study. *J. Psychopharmacol.* 19,  
1088 159–165. <https://doi.org/10.1177/0269881105048996>
- 1089 Bryant, R.A., Creamer, M., O'Donnell, M., Forbes, D., McFarlane, A.C., Silove, D., Hadzi-  
1090 Pavlovic, D., 2017. Acute and Chronic Posttraumatic Stress Symptoms in the Emergence  
1091 of Posttraumatic Stress Disorder. *JAMA Psychiatry* 74, 135.  
1092 <https://doi.org/10.1001/jamapsychiatry.2016.3470>
- 1093 Bryant, R.A., O'Donnell, M.L., Creamer, M., McFarlane, A.C., Silove, D., 2013. A Multisite  
1094 Analysis of the Fluctuating Course of Posttraumatic Stress Disorder. *JAMA Psychiatry*  
1095 70, 839. <https://doi.org/10.1001/jamapsychiatry.2013.1137>
- 1096 Calhoun, G.G., Tye, K.M., 2015. Resolving the neural circuits of anxiety. *Nat. Neurosci.* 18,  
1097 1394–1404. <https://doi.org/10.1038/nn.4101>

- 1098 Carobrez, A.P., Bertoglio, L.J., 2005. Ethological and temporal analyses of anxiety-like  
1099 behavior: The elevated plus-maze model 20 years on. *Neurosci. Biobehav. Rev.* 29, 1193–  
1100 1205. <https://doi.org/10.1016/j.neubiorev.2005.04.017>
- 1101 Chen, A., Shlapobersky, T., Schneidman, E., Shemesh, Y., Sztainberg, Y., Forkosh, O., 2013.  
1102 High-order social interactions in groups of mice. *Elife.*  
1103 <https://doi.org/10.7554/elife.00759>
- 1104 Cloninger, C.R., 1988. Anxiety and Theories of Emotion. *Handb. Anxiety* 2, 1–29.
- 1105 Cohen, S., Wills, T.A., 1985. Stress, Social Support, and the Buffering Hypothesis,  
1106 *Psychological Bulletin.*
- 1107 Crawley, J., Goodwin, F.K., 1980. Preliminary report of a simple animal behavior model for  
1108 the anxiolytic effects of benzodiazepines. *Pharmacol. Biochem. Behav.* 13, 167–170.  
1109 [https://doi.org/10.1016/0091-3057\(80\)90067-2](https://doi.org/10.1016/0091-3057(80)90067-2)
- 1110 Crusio, W.E., 2013. The genetics of exploratory behavior, in: Crusio, W.E., Sluyter, F., Gerlai,  
1111 R.T., Pietropaolo, S. (Eds.), *Behavioral Genetics of the Mouse*. Cambridge University  
1112 Press, Cambridge, pp. 148–154. <https://doi.org/10.1017/CBO9781139541022.016>
- 1113 Cryan, J.F., Holmes, A., 2005. The ascent of mouse: advances in modelling human depression  
1114 and anxiety. *Nat. Rev. Drug Discov.* 4, 775–790. <https://doi.org/10.1038/nrd1825>
- 1115 Davis, M., 1989. Sensitization of the acoustic startle reflex by footshock. *Behav. Neurosci.* 103,  
1116 495–503. <https://doi.org/10.1037/0735-7044.103.3.495>
- 1117 DeMorrow, S., DeMorrow, Sharon, 2018. Role of the Hypothalamic–Pituitary–Adrenal Axis  
1118 in Health and Disease. *Int. J. Mol. Sci.* 19, 986. <https://doi.org/10.3390/ijms19040986>
- 1119 Dik, A., Saffari, R., Zhang, M., Zhang, W., 2018. Contradictory effects of erythropoietin on  
1120 inhibitory synaptic transmission in left and right prelimbic cortex of mice. *Neurobiol.*  
1121 *Stress* 9, 113–123. <https://doi.org/10.1016/J.YNSTR.2018.08.008>
- 1122 Diven, K., 1937. Certain Determinants in the Conditioning of Anxiety Reactions. *J. Psychol.*  
1123 3, 291–308. <https://doi.org/10.1080/00223980.1937.9917499>
- 1124 Donaldson, G.P., Melanie Lee, S., Mazmanian, S.K., 2015. Gut biogeography of the bacterial  
1125 microbiota. *Nat. Publ. Gr.* 14. <https://doi.org/10.1038/nrmicro3552>
- 1126 DSM-5, 2013. Diagnostic and statistical manual of mental disorders (DSM-5). *Am. Psychiatr.*  
1127 *Assoc.* 947. <https://doi.org/10.1176/appi.books.9780890425596>
- 1128 DSM-III, 1980. Diagnostic and statistical manual of mental disorders (DSM-III). *Am.*  
1129 *Psychiatr. Assoc.*
- 1130 Ehlers, A., Clark, D.M., 2000. A cognitive model of posttraumatic stress disorder. *Behav. Res.*  
1131 *Ther.* 38, 319–345. [https://doi.org/10.1016/S0005-7967\(99\)00123-0](https://doi.org/10.1016/S0005-7967(99)00123-0)

- 1132 Engin, E., Treit, D., 2008. The effects of intra-cerebral drug infusions on animals'  
1133 unconditioned fear reactions: A systematic review. *Prog. Neuro-Psychopharmacology*  
1134 *Biol. Psychiatry* 32, 1399–1419. <https://doi.org/10.1016/j.pnpbp.2008.03.020>
- 1135 Ennaceur, A., 2014. Tests of unconditioned anxiety — Pitfalls and disappointments. *Physiol.*  
1136 *Behav.* 135, 55–71. <https://doi.org/10.1016/j.physbeh.2014.05.032>
- 1137 Funamizu, A., Kuhn, B., Doya, K., 2016. Neural substrate of dynamic Bayesian inference in  
1138 the cerebral cortex. *Nat. Neurosci.* 19, 1682–1689. <https://doi.org/10.1038/nn.4390>
- 1139 Garcia, A.M.B., Martinez, R.C.R., Morato, S., 2008. Preference for the light compartment of a  
1140 light/dark cage does not affect rat exploratory behavior in the elevated plus-maze. *Psychol.*  
1141 *& Neurosci.* 1, 73–80. <https://doi.org/10.1590/s1983-32882008000100012>
- 1142 Gilbertson, M.W., Shenton, M.E., Ciszewski, A., Kasai, K., Lasko, N.B., Orr, S.P., Pitman,  
1143 R.K., 2002. Smaller hippocampal volume predicts pathologic vulnerability to  
1144 psychological trauma. *Nat. Neurosci.* 5, 1242–1247. <https://doi.org/10.1038/nn958>
- 1145 Goto, T., Kubota, Y., Tanaka, Y., Iio, W., Moriya, N., Toyoda, A., 2014. Subchronic and mild  
1146 social defeat stress accelerates food intake and body weight gain with polydipsia-like  
1147 features in mice. *Behav. Brain Res.* 270, 339–348.  
1148 <https://doi.org/10.1016/J.BBR.2014.05.040>
- 1149 Grupe, D.W., Nitschke, J.B., 2013. Uncertainty and anticipation in anxiety: an integrated  
1150 neurobiological and psychological perspective. *Nat. Rev. Neurosci.* 14, 488–501.  
1151 <https://doi.org/10.1038/nrn3524>
- 1152 Gulick, D., Gould, T.J., 2009. Effects of Ethanol and Caffeine on Behavior in C57BL/6 Mice  
1153 in the Plus-Maze Discriminative Avoidance Task. *Behav. Neurosci.* 123, 1271–1278.  
1154 <https://doi.org/10.1037/a0017610>
- 1155 Hall, C., Ballachey, E.L., 1932. A study of the rat's behavior in a field. A contribution to  
1156 method in comparative psychology. *Univ. Calif. Publ. Psychol.* 1–12.
- 1157 Harvey, M.R., 1996. An ecological view of psychological trauma and trauma recovery. *J.*  
1158 *Trauma. Stress* 9, 3–23. <https://doi.org/10.1002/jts.2490090103>
- 1159 Hascoët, M., Bourin, M., Nic Dhonnchadha, B.Á., 2001. The mouse light-dark paradigm: A  
1160 review. *Prog. Neuro-Psychopharmacology Biol. Psychiatry* 25, 141–166.  
1161 [https://doi.org/10.1016/S0278-5846\(00\)00151-2](https://doi.org/10.1016/S0278-5846(00)00151-2)
- 1162 Hayes, J.P., VanElzaker, M.B., Shin, L.M., 2012. Emotion and cognition interactions in PTSD:  
1163 a review of neurocognitive and neuroimaging studies. *Front. Integr. Neurosci.* 6, 89.  
1164 <https://doi.org/10.3389/fnint.2012.00089>

- 1165 Henriques-Alves, A.M., Queiroz, C.M., 2016. Ethological Evaluation of the Effects of Social  
1166 Defeat Stress in Mice: Beyond the Social Interaction Ratio. *Front. Behav. Neurosci.* 9,  
1167 364. <https://doi.org/10.3389/fnbeh.2015.00364>
- 1168 Hetrick, S.E., Purcell, R., Garner, B., Parslow, R., 2010. Combined pharmacotherapy and  
1169 psychological therapies for post traumatic stress disorder (PTSD). *Cochrane Database*  
1170 *Syst. Rev.* <https://doi.org/10.1002/14651858.CD007316.pub2>
- 1171 Houston, F.P., Stevenson, G.D., McNaughton, B.L., Barnes, C.A., 1999. Effects of age on the  
1172 generalization and incubation of memory in the F344 rat. *Learn. Mem.* 6, 111–9.  
1173 <https://doi.org/10.1101/LM.6.2.111>
- 1174 Hrabe, J., Kaur, G., Guilfoyle, D.N., 2007. Principles and limitations of NMR diffusion  
1175 measurements. *J. Med. Phys.* 32, 34–42. <https://doi.org/10.4103/0971-6203.31148>
- 1176 Kaouane, N., Porte, Y., Vallée, M., Brayda-Bruno, L., Mons, N., Calandreau, L., Marighetto,  
1177 A., Piazza, P.V., Desmedt, A., 2012. Glucocorticoids can induce PTSD-like memory  
1178 impairments in mice. *Science* 335, 1510–3. <https://doi.org/10.1126/science.1207615>
- 1179 Kim, S., Mátyás, F., Lee, S., Acsády, L., Shin, H.-S., 2012. Lateralization of observational fear  
1180 learning at the cortical but not thalamic level in mice. *Proc. Natl. Acad. Sci. U. S. A.* 109,  
1181 15497–501. <https://doi.org/10.1073/pnas.1213903109>
- 1182 Knox, D., George, S.A., Fitzpatrick, C.J., Rabinak, C.A., Maren, S., Liberzon, I., 2012. Single  
1183 prolonged stress disrupts retention of extinguished fear in rats. *Learn. Mem.* 19, 43–9.  
1184 <https://doi.org/10.1101/lm.024356.111>
- 1185 Ko, J., 2017. Neuroanatomical Substrates of Rodent Social Behavior: The Medial Prefrontal  
1186 Cortex and Its Projection Patterns. *Front. Neural Circuits* 11, 41.  
1187 <https://doi.org/10.3389/fncir.2017.00041>
- 1188 Kohl, J., Babayan, B.M., Rubinstein, N.D., Autry, A.E., Marin-Rodriguez, B., Kapoor, V.,  
1189 Miyamishi, K., Zweifel, L.S., Luo, L., Uchida, N., Dulac, C., 2018. Functional circuit  
1190 architecture underlying parental behaviour. *Nature* 556, 326–331.  
1191 <https://doi.org/10.1038/s41586-018-0027-0>
- 1192 Krishnan, V., Han, M.-H., Graham, D.L., Berton, O., Renthal, W., Russo, S.J., Laplant, Q.,  
1193 Graham, A., Lutter, M., Lagace, D.C., Ghose, S., Reister, R., Tannous, P., Green, T.A.,  
1194 Neve, R.L., Chakravarty, S., Kumar, A., Eisch, A.J., Self, D.W., Lee, F.S., Tamminga,  
1195 C.A., Cooper, D.C., Gershenfeld, H.K., Nestler, E.J., 2007. Molecular adaptations  
1196 underlying susceptibility and resistance to social defeat in brain reward regions. *Cell* 131,  
1197 391–404. <https://doi.org/10.1016/j.cell.2007.09.018>

- 1198 Kuleshkaya, N., Voikar, V., 2014. Assessment of mouse anxiety-like behavior in the light–dark  
1199 box and open-field arena: Role of equipment and procedure. *Physiol. Behav.* 133, 30–38.  
1200 <https://doi.org/10.1016/J.PHYSBEH.2014.05.006>
- 1201 Kumar, V., Bhat, Z.A., Kumar, D., 2013. Animal models of anxiety: A comprehensive review.  
1202 *J. Pharmacol. Toxicol. Methods* 68, 175–183.  
1203 <https://doi.org/10.1016/J.VASCN.2013.05.003>
- 1204 Larkum, M., 2013. A cellular mechanism for cortical associations: an organizing principle for  
1205 the cerebral cortex. *Trends Neurosci.* 36, 141–151.  
1206 <https://doi.org/10.1016/J.TINS.2012.11.006>
- 1207 Lee, E., Hong, J., Park, Y.-G., Chae, S., Kim, Y., Kim, D., 2015. Left brain cortical activity  
1208 modulates stress effects on social behavior. *Sci. Rep.* 5, 13342.  
1209 <https://doi.org/10.1038/srep13342>
- 1210 Lee, R.X., Huang, J.-J., Huang, C., Tsai, M.-L., Yen, C.-T., 2015. Plasticity of cerebellar  
1211 Purkinje cells in behavioral training of body balance control. *Front. Syst. Neurosci.* 9, 1–  
1212 15. <https://doi.org/10.3389/fnsys.2015.00113>
- 1213 Lee, R.X., Huang, J.J., Huang, C., Tsai, M.L., Yen, C.T., 2014. Collateral projections from  
1214 vestibular nuclear and inferior olivary neurons to lobules I/II and IX/X of the rat cerebellar  
1215 vermis: A double retrograde labeling study. *Eur. J. Neurosci.* 40, 2811–2821.  
1216 <https://doi.org/10.1111/ejn.12648>
- 1217 Marlin, B.J., Froemke, R.C., 2017. Oxytocin modulation of neural circuits for social behavior.  
1218 *Dev. Neurobiol.* 77, 169–189. <https://doi.org/10.1002/dneu.22452>
- 1219 Marlin, B.J., Mitre, M., D’amour, J.A., Chao, M. V., Froemke, R.C., 2015. Oxytocin enables  
1220 maternal behaviour by balancing cortical inhibition. *Nature* 520, 499–504.  
1221 <https://doi.org/10.1038/nature14402>
- 1222 Mataix-Cols, D., Fernández de la Cruz, L., Monzani, B., Rosenfield, D., Andersson, E., Pérez-  
1223 Vigil, A., Frumento, P., de Kleine, R.A., Difede, J., Dunlop, B.W., Farrell, L.J., Geller,  
1224 D., Gerardi, M., Guastella, A.J., Hofmann, S.G., Hendriks, G.-J., Kushner, M.G., Lee,  
1225 F.S., Lenze, E.J., Levinson, C.A., McConnell, H., Otto, M.W., Plag, J., Pollack, M.H.,  
1226 Ressler, K.J., Rodebaugh, T.L., Rothbaum, B.O., Scheeringa, M.S., Siewert-Siegmund,  
1227 A., Smits, J.A.J., Storch, E.A., Ströhle, A., Tart, C.D., Tolin, D.F., van Minnen, A., Waters,  
1228 A.M., Weems, C.F., Wilhelm, S., Wyka, K., Davis, M., Rück, C., Altemus, M., Anderson,  
1229 P., Cukor, J., Finck, C., Geffken, G.R., Golfels, F., Goodman, W.K., Gutner, C., Heyman,  
1230 I., Jovanovic, T., Lewin, A.B., McNamara, J.P., Murphy, T.K., Norrholm, S., Thuras, P.,  
1231 2017. D-Cycloserine Augmentation of Exposure-Based Cognitive Behavior Therapy for

- 1232 Anxiety, Obsessive-Compulsive, and Posttraumatic Stress Disorders. *JAMA Psychiatry*  
1233 74, 501. <https://doi.org/10.1001/jamapsychiatry.2016.3955>
- 1234 Matias, S., Lottem, E., Dugué, G.P., Mainen, Z.F., 2017. Activity patterns of serotonin neurons  
1235 underlying cognitive flexibility. *Elife* 6, e20552. <https://doi.org/10.7554/eLife.20552>
- 1236 McAllister DE, M.W., 1967. Incubation of fear: An examination of the concept. *J Exp Res*  
1237 *Personal.* 2, 180–190.
- 1238 McFarlane, A.C., 2010. The long-term costs of traumatic stress: intertwined physical and  
1239 psychological consequences. *World Psychiatry* 9, 3–10. [https://doi.org/10.1002/j.2051-](https://doi.org/10.1002/j.2051-5545.2010.tb00254.x)  
1240 [5545.2010.tb00254.x](https://doi.org/10.1002/j.2051-5545.2010.tb00254.x)
- 1241 McHugh, P.R., Treisman, G., 2007. PTSD: A problematic diagnostic category. *J. Anxiety*  
1242 *Disord.* 21, 211–222. <https://doi.org/10.1016/J.JANXDIS.2006.09.003>
- 1243 McIntyre, D.C., 2006. The Kindling Phenomenon. Model. *Seizures Epilepsy* 351–363.  
1244 <https://doi.org/10.1016/B978-012088554-1/50030-X>
- 1245 McIntyre, D.C., Kelly, M.E., 2006. The Parahippocampal Cortices and Kindling. *Ann. N. Y.*  
1246 *Acad. Sci.* 911, 343–354. <https://doi.org/10.1111/j.1749-6632.2000.tb06736.x>
- 1247 Miczek, K.A., O'Donnell, J.M., 1978. Intruder-evoked aggression in isolated and nonisolated  
1248 mice: Effects of psychomotor stimulants and l-Dopa. *Psychopharmacology (Berl)*. 57, 47–  
1249 55. <https://doi.org/10.1007/BF00426957>
- 1250 Mori, S. (Susumu), 2007. Introduction to diffusion tensor imaging. Elsevier.
- 1251 Murugan, M., Jang, H.J., Park, M., Miller, E.M., Cox, J., Taliaferro, J.P., Parker, N.F., Bhave,  
1252 V., Hur, H., Liang, Y., Nectow, A.R., Pillow, J.W., Witten, I.B., 2017. Combined Social  
1253 and Spatial Coding in a Descending Projection from the Prefrontal Cortex. *Cell* 171, 1663-  
1254 1677.e16. <https://doi.org/10.1016/j.cell.2017.11.002>
- 1255 Nadler, J.J., Moy, S.S., Dold, G., Simmons, N., Perez, A., Young, N.B., Barbaro, R.P., Piven,  
1256 J., Magnuson, T.R., Crawley, J.N., Crawley, J.N., 2004. Automated apparatus for  
1257 quantitation of social approach behaviors in mice. *Genes, Brain Behav.* 3, 303–314.  
1258 <https://doi.org/10.1111/j.1601-183X.2004.00071.x>
- 1259 Nath, T., Mathis, A., Chen, A.C., Patel, A., Bethge, M., Mathis, M.W., 2019. Using  
1260 DeepLabCut for 3D markerless pose estimation across species and behaviors. *Nat. Protoc.*  
1261 1. <https://doi.org/10.1038/s41596-019-0176-0>
- 1262 Otabi, H., Goto, T., Okayama, T., Kohari, D., Toyoda, A., 2017. The acute social defeat stress  
1263 and nest-building test paradigm: A potential new method to screen drugs for depressive-  
1264 like symptoms. *Behav. Processes* 135, 71–75.  
1265 <https://doi.org/10.1016/J.BEPROC.2016.12.003>

- 1266 Pai, A., Suris, A., North, C., Pai, A., Suris, A.M., North, C.S., 2017. Posttraumatic Stress  
1267 Disorder in the DSM-5: Controversy, Change, and Conceptual Considerations. *Behav. Sci.*  
1268 (Basel). 7, 7. <https://doi.org/10.3390/bs7010007>
- 1269 Pamplona, F.A., Henes, K., Micale, V., Mauch, C.P., Takahashi, R.N., Wotjak, C.T., 2011.  
1270 Prolonged fear incubation leads to generalized avoidance behavior in mice. *J. Psychiatr.*  
1271 *Res.* 45, 354–360. <https://doi.org/10.1016/J.JPSYCHIRES.2010.06.015>
- 1272 Patki, G., Solanki, N., Salim, S., 2014. Witnessing traumatic events causes severe behavioral  
1273 impairments in rats. *Int. J. Neuropsychopharmacol.* 17, 2017–2029.  
1274 <https://doi.org/10.1017/S1461145714000923>
- 1275 Pavić, L., Gregurek, R., Radoš, M., Brkljačić, B., Brajković, L., Šimetin-Pavić, I., Ivanac, G.,  
1276 Pavliša, G., Kalousek, V., 2007. Smaller right hippocampus in war veterans with  
1277 posttraumatic stress disorder. *Psychiatry Res. Neuroimaging* 154, 191–198.  
1278 <https://doi.org/10.1016/J.PSCYCHRESNS.2006.08.005>
- 1279 Pellow, S., Chopin, P., File, S.E., Briley, M., 1985. Validation of open : closed arm entries in  
1280 an elevated plus-maze as a measure of anxiety in the rat. *J. Neurosci. Methods* 14, 149–  
1281 167. [https://doi.org/10.1016/0165-0270\(85\)90031-7](https://doi.org/10.1016/0165-0270(85)90031-7)
- 1282 Philbert, J., Pichat, P., Beeské, S., Decobert, M., Belzung, C., Griebel, G., 2011. Acute  
1283 inescapable stress exposure induces long-term sleep disturbances and avoidance behavior:  
1284 A mouse model of post-traumatic stress disorder (PTSD). *Behav. Brain Res.* 221, 149–  
1285 154. <https://doi.org/10.1016/J.BBR.2011.02.039>
- 1286 Poulos, A.M., Reger, M., Mehta, N., Zhuravka, I., Sterlace, S.S., Gannam, C., Hovda, D.A.,  
1287 Giza, C.C., Fanselow, M.S., 2014. Amnesia for early life stress does not preclude the adult  
1288 development of posttraumatic stress disorder symptoms in rats. *Biol. Psychiatry* 76, 306–  
1289 14. <https://doi.org/10.1016/j.biopsych.2013.10.007>
- 1290 Ramos, A., 2008. Animal models of anxiety: do I need multiple tests? *Trends Pharmacol. Sci.*  
1291 29, 493–498. <https://doi.org/10.1016/J.TIPS.2008.07.005>
- 1292 Ramos, A., Pereira, E., Martins, G.C., Wehrmeister, T.D., Izídio, G.S., 2008. Integrating the  
1293 open field, elevated plus maze and light/dark box to assess different types of emotional  
1294 behaviors in one single trial. *Behav. Brain Res.* 193, 277–288.  
1295 <https://doi.org/10.1016/J.BBR.2008.06.007>
- 1296 Rau, V., DeCola, J.P., Fanselow, M.S., 2005. Stress-induced enhancement of fear learning: An  
1297 animal model of posttraumatic stress disorder. *Neurosci. Biobehav. Rev.* 29, 1207–1223.  
1298 <https://doi.org/10.1016/J.NEUBIOREV.2005.04.010>

- 1299 Remedios, R., Kennedy, A., Zelikowsky, M., Grewe, B.F., Schnitzer, M.J., Anderson, D.J.,  
1300 2017. Social behaviour shapes hypothalamic neural ensemble representations of  
1301 conspecific sex. *Nature* 550, 388–392. <https://doi.org/10.1038/nature23885>
- 1302 Roome, C.J., Kuhn, B., 2018. Simultaneous dendritic voltage and calcium imaging and somatic  
1303 recording from Purkinje neurons in awake mice. *Nat. Commun.* 9, 3388.  
1304 <https://doi.org/10.1038/s41467-018-05900-3>
- 1305 Scherer, A., Boecker, M., Pawelzik, M., Gauggel, S., Forkmann, T., 2017. Emotion  
1306 suppression, not reappraisal, predicts psychotherapy outcome. *Psychother. Res.* 27, 143–  
1307 153. <https://doi.org/10.1080/10503307.2015.1080875>
- 1308 Schnyder, U., Cloitre, M., 2015. Evidence based treatments for trauma-related psychological  
1309 disorders : a practical guide for clinicians.
- 1310 Shin, L.M., Rauch, S.L., Pitman, R.K., 2006. Amygdala, Medial Prefrontal Cortex, and  
1311 Hippocampal Function in PTSD. *Ann. N. Y. Acad. Sci.* 1071, 67–79.  
1312 <https://doi.org/10.1196/annals.1364.007>
- 1313 Sial, O.K., Warren, B.L., Alcantara, L.F., Parise, E.M., Bolaños-Guzmán, C.A., 2016.  
1314 Vicarious social defeat stress: Bridging the gap between physical and emotional stress. *J.*  
1315 *Neurosci. Methods* 258, 94–103. <https://doi.org/10.1016/J.JNEUMETH.2015.10.012>
- 1316 Siegmund, A., Wotjak, C.T., 2006. Toward an Animal Model of Posttraumatic Stress Disorder.  
1317 *Ann. N. Y. Acad. Sci.* 1071, 324–334. <https://doi.org/10.1196/annals.1364.025>
- 1318 Sullivan, S.E., Joseph, N.F., Jamieson, S., King, M.L., Chévere-Torres, I., Fuentes, I.,  
1319 Shumyatsky, G.P., Brantley, A.F., Rumbaugh, G., Miller, C.A., 2017. Susceptibility and  
1320 Resilience to Posttraumatic Stress Disorder-like Behaviors in Inbred Mice. *Biol.*  
1321 *Psychiatry* 82, 924–933. <https://doi.org/10.1016/J.BIOPSYCH.2017.06.030>
- 1322 Stephens, E.K., Avesar, D., Gullledge, A.T., 2014. Activity-dependent serotonergic excitation  
1323 of callosal projection neurons in the mouse prefrontal cortex. *Front. Neural Circuits* 8, 97.  
1324 <https://doi.org/10.3389/fncir.2014.00097>
- 1325 Suarez, S.D., Gallup, G.G., 1981. An ethological analysis of open-field behavior in rats and  
1326 mice. *Learn. Motiv.* 12, 342–363. [https://doi.org/10.1016/0023-9690\(81\)90013-8](https://doi.org/10.1016/0023-9690(81)90013-8)
- 1327 Sullivan, R.M., Gratton, A., 1998. Relationships between stress-induced increases in medial  
1328 prefrontal cortical dopamine and plasma corticosterone levels in rats: role of cerebral  
1329 laterality. *Neuroscience* 83, 81–91. [https://doi.org/10.1016/S0306-4522\(97\)00370-9](https://doi.org/10.1016/S0306-4522(97)00370-9)
- 1330 Takahashi, A., Lee, R.X., Iwasato, T., Itohara, S., Arima, H., Bettler, B., Miczek, K.A., Koide,  
1331 T., 2015. Glutamate input in the dorsal raphe nucleus as a determinant of escalated  
1332 aggression in male mice. *J. Neurosci.* 35, 6452–63.  
1333 <https://doi.org/10.1523/JNEUROSCI.2450-14.2015>



- 1334 Tononi, G., Boly, M., Massimini, M., Koch, C., 2016. Integrated information theory: from  
1335 consciousness to its physical substrate. *Nat. Rev. Neurosci.* 17, 450–461.  
1336 <https://doi.org/10.1038/nrn.2016.44>
- 1337 Tovote, P., Fadok, J.P., Lüthi, A., 2015. Neuronal circuits for fear and anxiety. *Nat. Rev.*  
1338 *Neurosci.* 16, 317–331. <https://doi.org/10.1038/nrn3945>
- 1339 Tsuda, M.C., Ogawa, S., 2012. Long-Lasting Consequences of Neonatal Maternal Separation  
1340 on Social Behaviors in Ovariectomized Female Mice. *PLoS One* 7, e33028.  
1341 <https://doi.org/10.1371/journal.pone.0033028>
- 1342 Tsuda, M.C., Yeung, H.-M., Kuo, J., Usdin, T.B., 2015. Incubation of Fear Is Regulated by  
1343 TIP39 Peptide Signaling in the Medial Nucleus of the Amygdala. *J. Neurosci.* 35, 12152–  
1344 61. <https://doi.org/10.1523/JNEUROSCI.1736-15.2015>
- 1345 Vasconcelos, M., Hollis, K., Nowbahari, E., Kacelnik, A., 2012. Pro-sociality without empathy.  
1346 *Biol. Lett.* 8, 910–912. <https://doi.org/10.1098/rsbl.2012.0554>
- 1347 Walf, A.A., Frye, C.A., 2007. The use of the elevated plus maze as an assay of anxiety-related  
1348 behavior in rodents. *Nat. Protoc.* 2, 322–328. <https://doi.org/10.1038/nprot.2007.44>
- 1349 Walton, J.L., Cuccurullo, L.-A.J., Raines, A.M., Vidaurri, D.N., Allan, N.P., Maieritsch, K.P.,  
1350 Franklin, C.L., 2017. Sometimes Less is More: Establishing the Core Symptoms of PTSD.  
1351 *J. Trauma. Stress* 30, 254–258. <https://doi.org/10.1002/jts.22185>
- 1352 Warren, B.L., Vialou, V.F., Iñiguez, S.D., Alcantara, L.F., Wright, K.N., Feng, J., Kennedy,  
1353 P.J., LaPlant, Q., Shen, L., Nestler, E.J., Bolaños-Guzmán, C.A., 2013. Neurobiological  
1354 Sequelae of Witnessing Stressful Events in Adult Mice. *Biol. Psychiatry* 73, 7–14.  
1355 <https://doi.org/10.1016/J.BIOPSYCH.2012.06.006>
- 1356 Wu, L., Meng, J., Shen, Q., Zhang, Y., Pan, S., Chen, Z., Zhu, L.-Q., Lu, Y., Huang, Y., Zhang,  
1357 G., 2017. Caffeine inhibits hypothalamic A1R to excite oxytocin neuron and ameliorate  
1358 dietary obesity in mice. *Nat. Commun.* 8, 15904. <https://doi.org/10.1038/ncomms15904>
- 1359 Zelikowsky, M., Hui, M., Karigo, T., Choe, A., Yang, B., Blanco, M.R., Beadle, K., Gradinaru,  
1360 V., Deverman, B.E., Anderson, D.J., 2018. The Neuropeptide Tac2 Controls a Distributed  
1361 Brain State Induced by Chronic Social Isolation Stress. *Cell* 173, 1265-1279.e19.  
1362 <https://doi.org/10.1016/J.CELL.2018.03.037>
- 1363 Zoladz, P.R., Diamond, D.M., 2013. Current status on behavioral and biological markers of  
1364 PTSD: A search for clarity in a conflicting literature. *Neurosci. Biobehav. Rev.* 37, 860–  
1365 895. <https://doi.org/10.1016/J.NEUBIOREV.2013.03.024>
- 1366

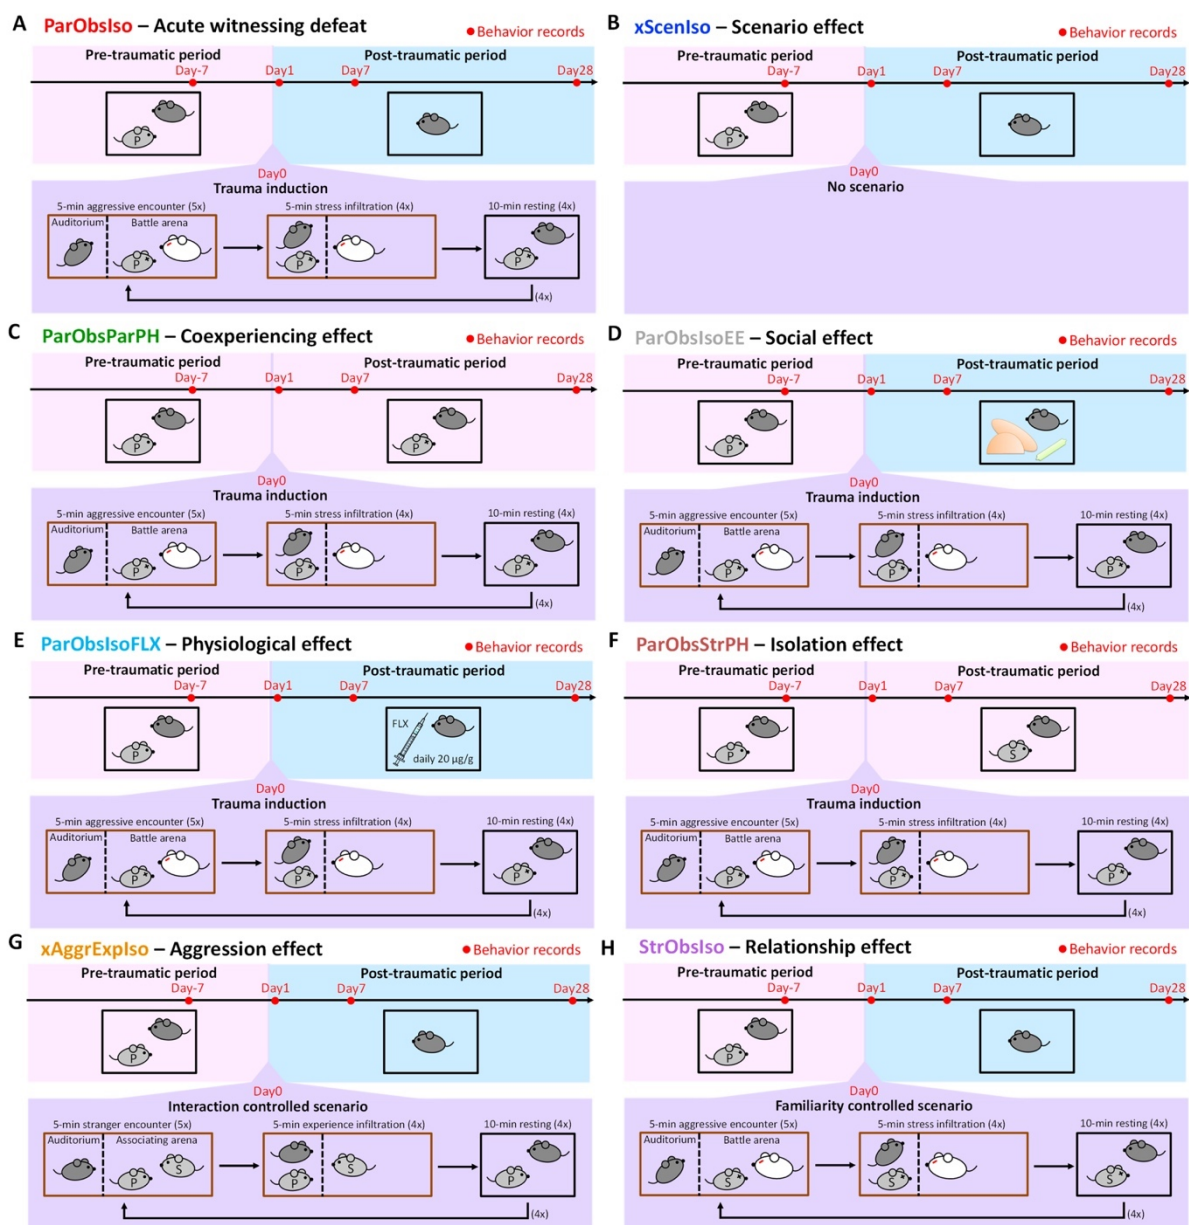

1367

1368 **Figure 1. Paradigm inducing PTSD-like behavior in mice and seven control paradigms.**

1369 (A) Paradigm with acute psychosocial trauma induction in mice. Focal mouse [dark gray;

1370 Partner-Observing-Isolated (ParObsIso) mouse], partner mouse (light gray P), aggressor

1371 mouse (white), focal mouse's homecage (black), aggressor's homecage (brown), and wire-

1372 meshed divider (dashed line). (B) No-Scenario-Isolated (xScenIso) mice were separated

1373 without trauma induction and identified the scenario effect in the behavioral paradigm. (C)

1374 Partner-Observing-Partner-Pair-Housed (ParObsParPH) mice were pair-housed with their

1375 partners after trauma induction and identified the social transfer effect of co-experiencing

1376 trauma in the behavioral paradigm. (D) Partner-Observing-Isolated-Environment-Enriched

1377 (ParObsIsoEE) mice were provided with toys after trauma induction and identified the social

1378 rescue effect in the behavioral paradigm. (E) Partner-Observing-Isolated-Fluoxetine-treated

1379 (ParObsIsoFLX) mice were treated with fluoxetine after trauma induction and identified the  
1380 pharmacological rescue effect in the behavioral paradigm. **(F)** Partner-Observing-Stranger-  
1381 Pair-Housed (ParObsStrPH) mice were pair-housed with strangers after trauma induction and  
1382 identified the isolation effect in the behavioral paradigm. **(G)** Non-Aggressor-Exposed-  
1383 Isolated (xAggrExpIso) mice had experience of social interactions without witnessing stress  
1384 from strangers and identified the aggression effect in the behavioral paradigm. **(H)** Stranger-  
1385 Observing-Isolated (StrObsIso) mice had witnessing experience of trauma that happened to  
1386 strangers, rather than to their pair-housed partners, and identified the relationship effect in the  
1387 behavioral paradigm.

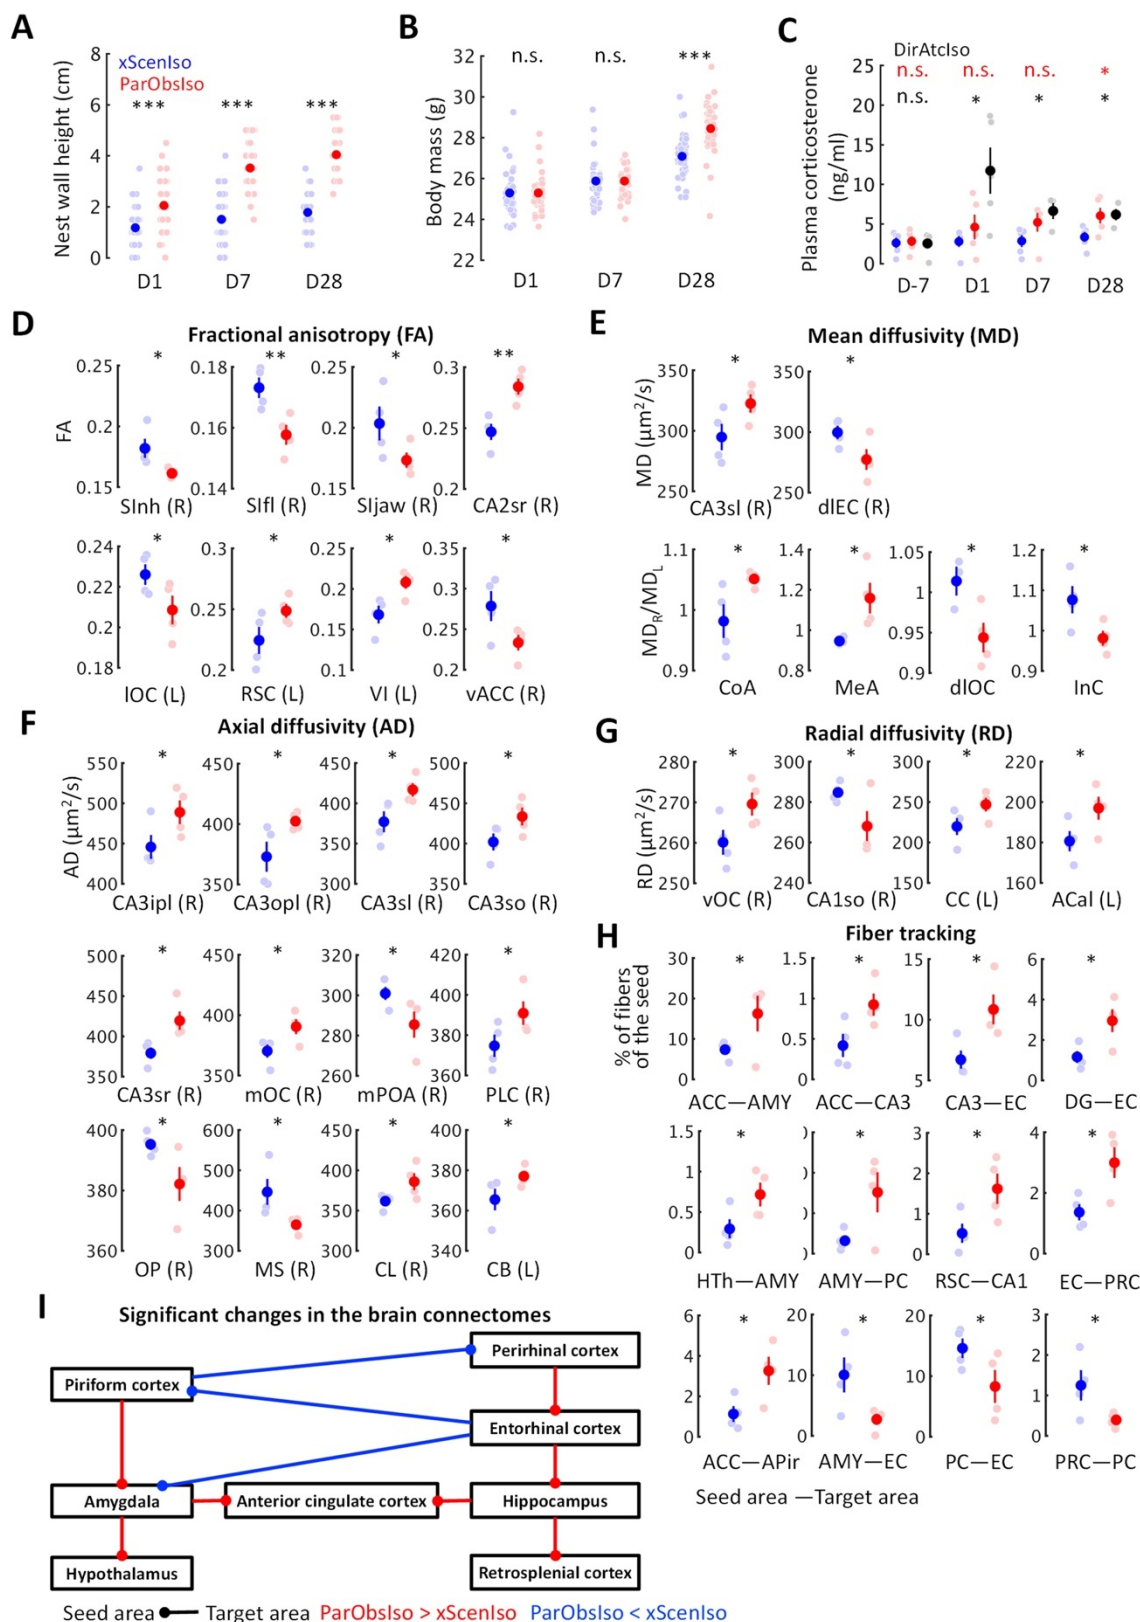

1388

1389 **Figure 2. Long-term and delayed effects on multiple behaviors and physical conditions.**

1390 (A) Nest wall heights show long-lasting significant differences after trauma induction. (B)

1391 Body mass shows a significant increase 28 days after trauma induction. (C) Baseline plasma

1392 corticosterone level increased after trauma induction for both ParObsIso mice and their partners,  
1393 the DirAtcIso mice. **(D)** Fractional anisotropy (FA) of DTI-based water diffusivity suggests  
1394 the changes of average microstructural integrity in multiple areas of the cerebral cortex. IOC,  
1395 lateral orbital cortex; SI<sub>nh</sub>, non-homunculus region of the primary sensory cortex; SI<sub>fl</sub>,  
1396 forelimb region of the primary sensory cortex; SI<sub>jaw</sub>, jaw region of the primary sensory cortex;  
1397 vACC, ventral region of the anterior cingulate cortex; CA2<sub>sr</sub>, stratum radiatum of the  
1398 hippocampal cornu ammonis (CA) 2 area; RSC, the retrosplenial cortex; VI, the primary visual  
1399 cortex; (R), the right area; (L), the left area. **(E)** DTI-based mean water diffusivity (MD)  
1400 suggests the changes of membrane density in multiple areas of the entorhinal cortex-  
1401 hippocampus system and the straitening of structural hemispheric specializations in the  
1402 amygdala-insular cortex system. dIOC, dorsolateral orbital cortex; InC, the insular cortex; CoA,  
1403 the cortical amygdalar nucleus; MeA, medial amygdalar nucleus; CA3<sub>sl</sub>, stratum lucidum of  
1404 the hippocampal CA3 area; dIEC, dorsolateral entorhinal cortex. **(F)** DTI-based axial water  
1405 diffusivity (AD) suggests the changes of neurite organization in multiple areas of the cerebral  
1406 cortex and white matter mainly in the right hemisphere. OP, olfactory peduncle; PLC,  
1407 prelimbic cortex; mOC, medial orbital cortex; CL, claustrum; MS, medial septal complex;  
1408 mPOA, medial preoptic area; CB, cingulum bundle; CA3<sub>sr</sub>, stratum radiatum of the  
1409 hippocampal CA3 area; CA3<sub>sl</sub>, stratum lucidum of the hippocampal CA3 area; CA3<sub>so</sub>, stratum  
1410 oriens of the hippocampal CA3 area; CA3<sub>ipl</sub>, inner pyramidal layer of the hippocampal CA3  
1411 area; CA3<sub>opl</sub>, outer pyramidal layer of the hippocampal CA3 area. **(G)** DTI-based radial water  
1412 diffusivity (RD) suggests the changes of myelination in multiple areas of the cerebral cortex in  
1413 the right hemisphere and the white matter in the left hemisphere. vOC, ventral orbital cortex;  
1414 ACal, anterior limb of the anterior commissure; CC, corpus callosum; CA1<sub>so</sub>, stratum oriens  
1415 of the hippocampal CA1 area. **(H)** DTI-based network-wise fiber tracking reveals specific  
1416 chronic changes of structural connectivity in the brain. AMY, the amygdala; HTh, the  
1417 hypothalamus; DG, the hippocampal dentate gyrus; PC, the piriform cortex; PRC, the  
1418 perirhinal cortex; APir, the amygdalopiriform transition area. Note that the brain regions were  
1419 in the right brain hemisphere. **(I)** Trauma-induced structural changes of the underlying brain  
1420 connectome revealed a network enhancement centered at the anterior cingulate cortex. Error  
1421 bars indicate standard errors of the means; n.s.,  $p \geq 0.05$ ; \*,  $0.01 \leq p < 0.05$ ; \*\*\*,  $p < 0.001$ ; two-  
1422 sample Student's t-test.

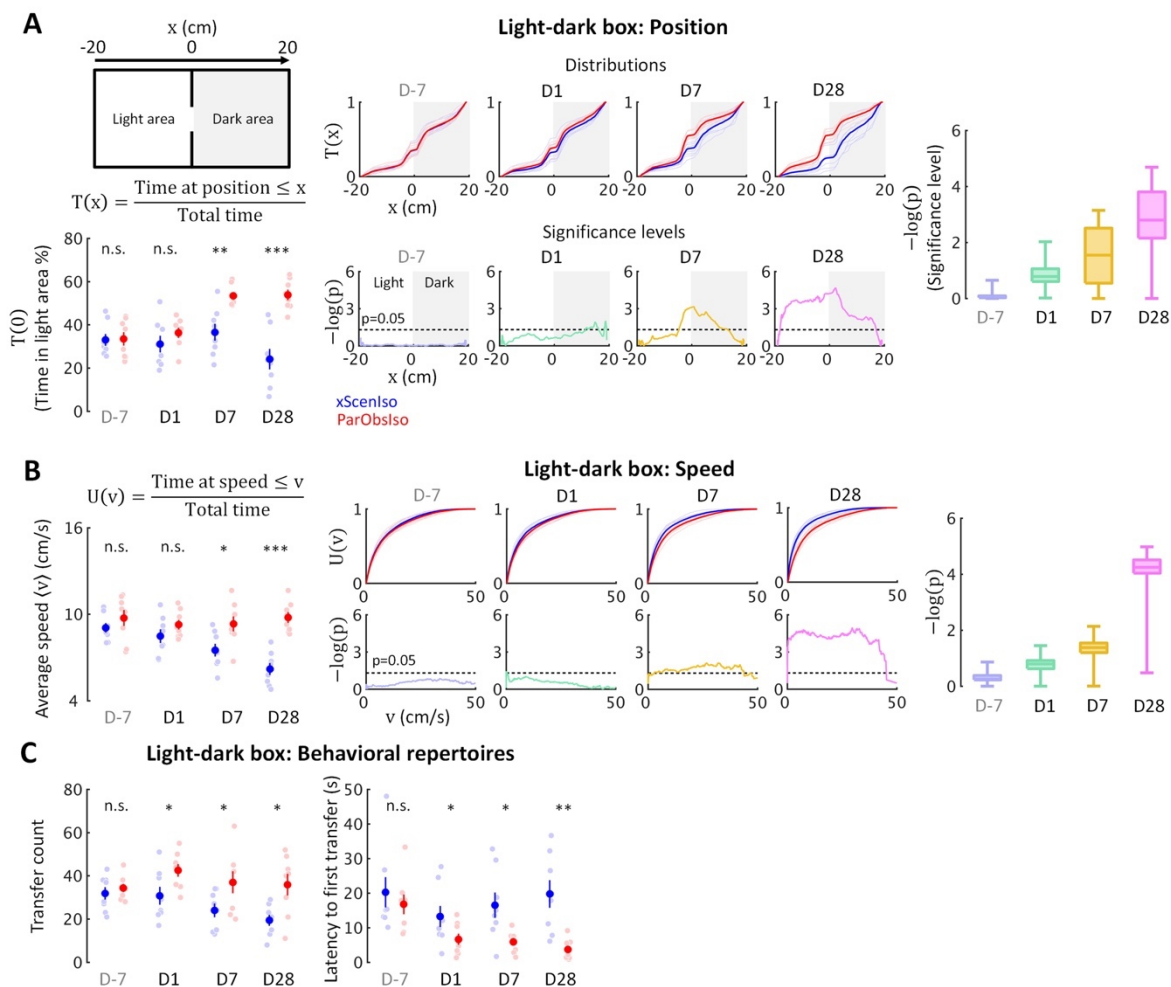

1423

1424 **Figure 3. Fine-scale behavioral analysis in light-dark box test detects the gradually**  
 1425 **developing process of the behavioral difference. (A)** Light-dark box test quantified through  
 1426 the cumulative position probability  $T(x)$  along the light-dark axis (left; total time = 300 s). On  
 1427 average, ParObsIso mice (red) spent more time in the light area than xScenIso mice (blue)  
 1428 during the late post-traumatic period [T(0), bottom-left]. Spatially fine-scale behavioral  
 1429 analysis reveals significant differences between ParObsIso and xScenIso populations already  
 1430 in the early post-traumatic period (middle). For each position, we compute the mean  $T(x)$   
 1431 across the xScenIso and ParObsIso populations and compute statistical significance through a  
 1432 two-population Student's t-test. These differences gradually increased, as evidenced by  
 1433 significance distributions collapsed across all positions (right; box plots show the minima,  
 1434 lower quartiles, medians, upper quartiles, and maxima). **(B)** We similarly quantified speed  
 1435 using the fine-scale cumulative distribution  $U(v)$  of having speed  $\leq v$  and we show the statistical  
 1436 analysis of population differences in  $U(v)$ . Cumulative distribution functions of locomotion  
 1437 speed ( $U(v)$  of having speed  $\leq v$ ) and corresponding significance distributions provide an  
 1438 additional independent behavioral index that showed a gradually increasing differences of

1439 higher speed in ParObsIso mice. **(C)** Higher transfer counts and shorter latency to the first  
1440 transfers in ParObsIso mice suggest their higher activity and exploratory motivation,  
1441 respectively.

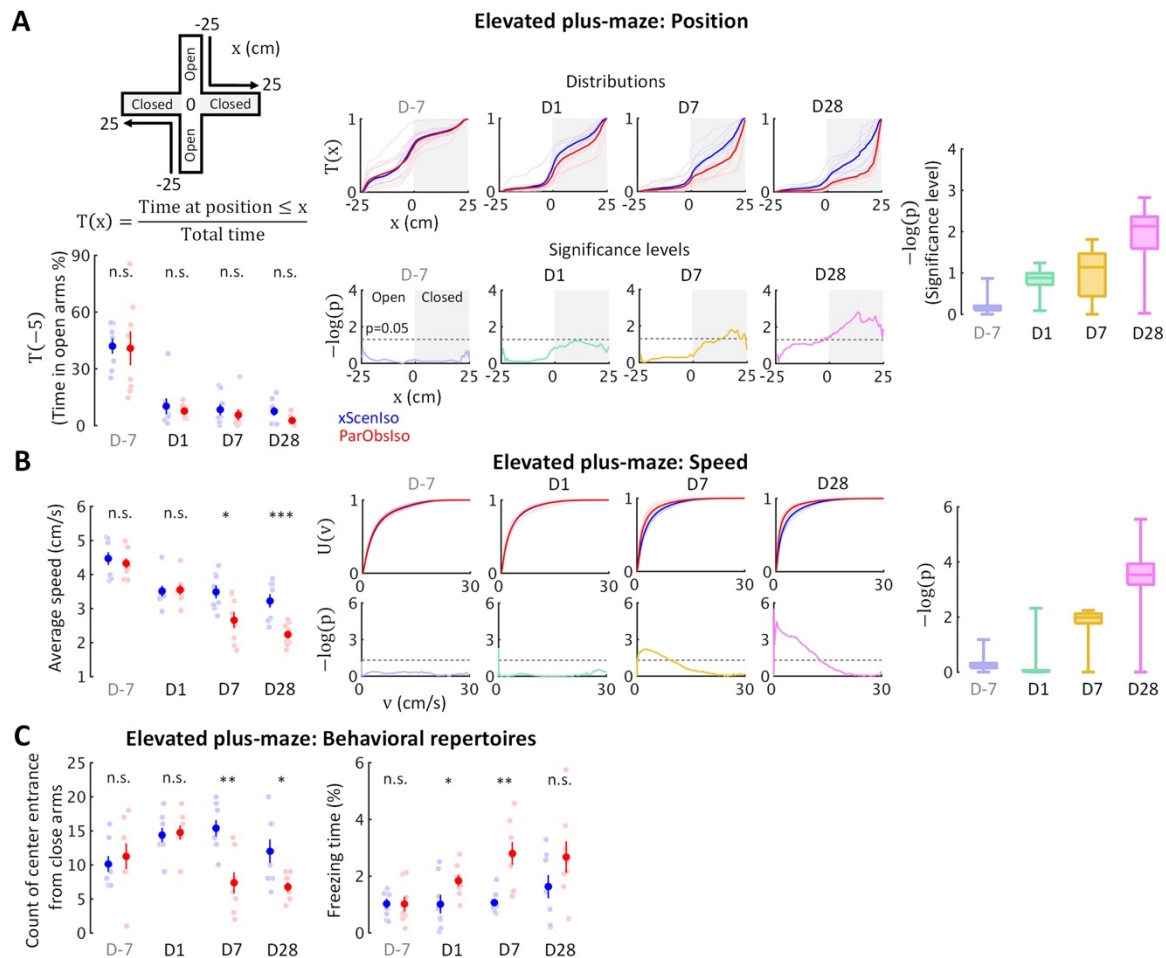

1442

1443 **Figure 4. Behavioral testing in the elevated plus-maze demonstrates that stress incubation**  
 1444 **of anxiety caused the observed differences. (A)** ParObsIso and xScenIso mice did not differ  
 1445 significantly in the time they spent in opened arms (total time = 300 s); however, spatial  
 1446 distributions show differences in preferred location between ParObsIso and xScenIso mice in  
 1447 the closed arms, which increased with time. **(B)** Cumulative distribution functions of  
 1448 locomotion speed and corresponding significance distributions show a gradually increasing  
 1449 differences of lower speeds in ParObsIso mice. **(C)** Less exploration from close arms to  
 1450 platform center and longer freezing time in ParObsIso mice suggest their stronger stress  
 1451 reactions.



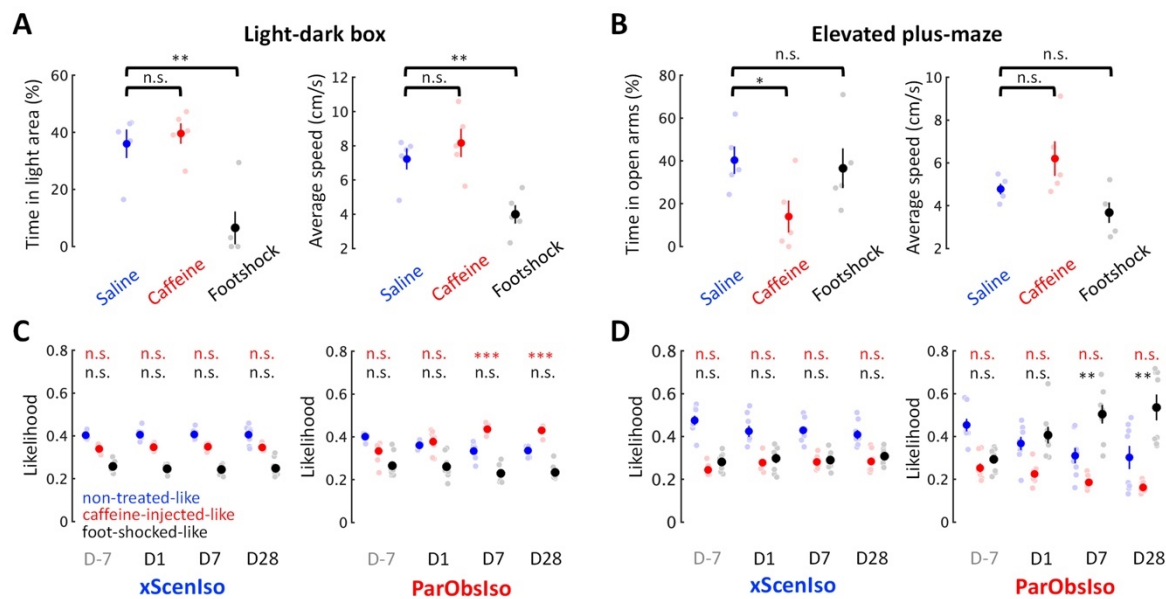

1452

1453

1454

1455

1456

1457

1458

1459

1460

1461

1462

1463

1464

1465

**Figure 5. Comparison of behavioral characteristics in high-dimensional state-space indicates chronic somatic and cognitive anxiety developed in stress incubation. (A)** Footshocked mice displayed less time spent in the light area and slower locomotion compared with the saline-injected and caffeine-injected mice in the light-dark box test. **(B)** Caffeine-injected mice displayed less time spent in the opened arms compared with the saline-injected and footshocked mice in the elevated plus-maze test. **(C)** In the light-dark box test, xScenIso mice stably showed non-treated-like behavioral characteristics after separated with its pair-housed partners, while ParObsIso mice increased their caffeine-injected-like behavioral characteristics in the corresponding period. **(D)** In the elevated plus-maze test, xScenIso mice kept showing highest likelihood of behavioral characteristics as non-treated-like after separated with its pair-housed partners, while ParObsIso mice increased their foot-shocked-like behavioral characteristics in the corresponding period. Note that comparison of behavioral characteristics in high-dimensional state-space was tested by one-tailed, two-sample Student's t-test.

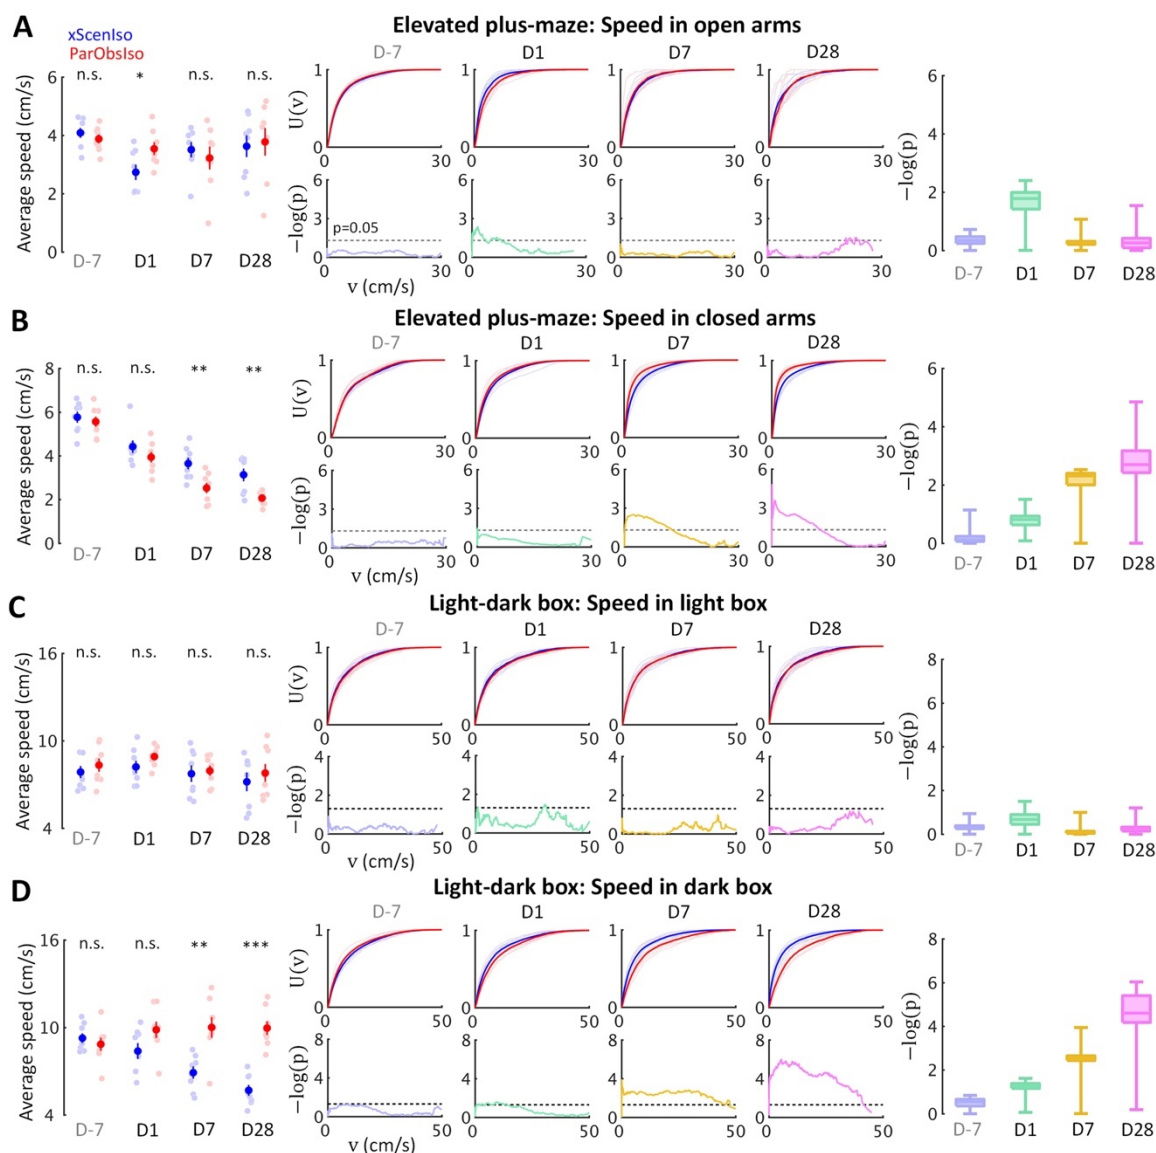

1466

1467 **Figure 6. Gradually increasing anxiety and acute fear reaction were untangled in**  
 1468 **standard behavioral tests as different psychological components with distinctive**  
 1469 **developments.** Locomotion speed shows acute difference only in stressor zones [open arms  
 1470 **(A)** and light area **(C)**], but incubated differences in stressor-free zones [dark area **(B)** and  
 1471 closed arms **(D)**].

1472

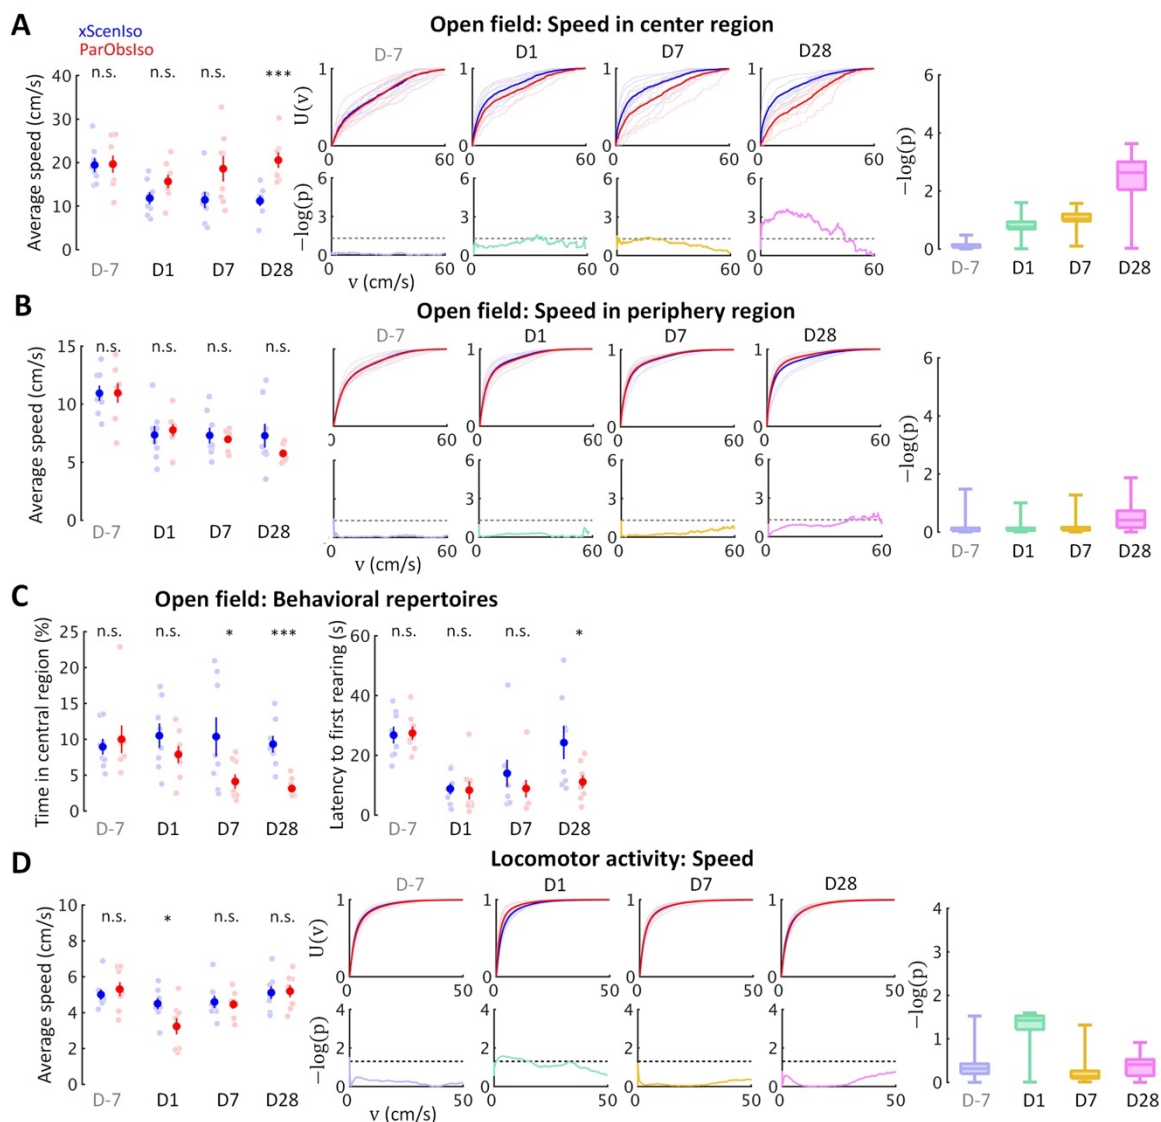

1473

1474 **Figure 7. Behavioral testing in the open field test and locomotor activity test confirms**  
 1475 **distinctive psychological substrates and their corresponding development patterns. (A)**  
 1476 Anxiety is evident in the open field test through a delayed onset of locomotor speed differences  
 1477 in the center region with higher spatial uncertainty. **(B)** The differences of locomotor speed  
 1478 observed in the center region did not occur in the periphery region with lower spatial  
 1479 uncertainty. **(C)** Less time spent in the central region by ParObsIso mice suggests their  
 1480 avoidance of a region with high special uncertainty, while shorter latency to their first rearing  
 1481 indicates their higher exploratory motivation. **(D)** In the locomotor activity test without  
 1482 stressors, acute effects of activity reduction recovered in the later post-traumatic period.

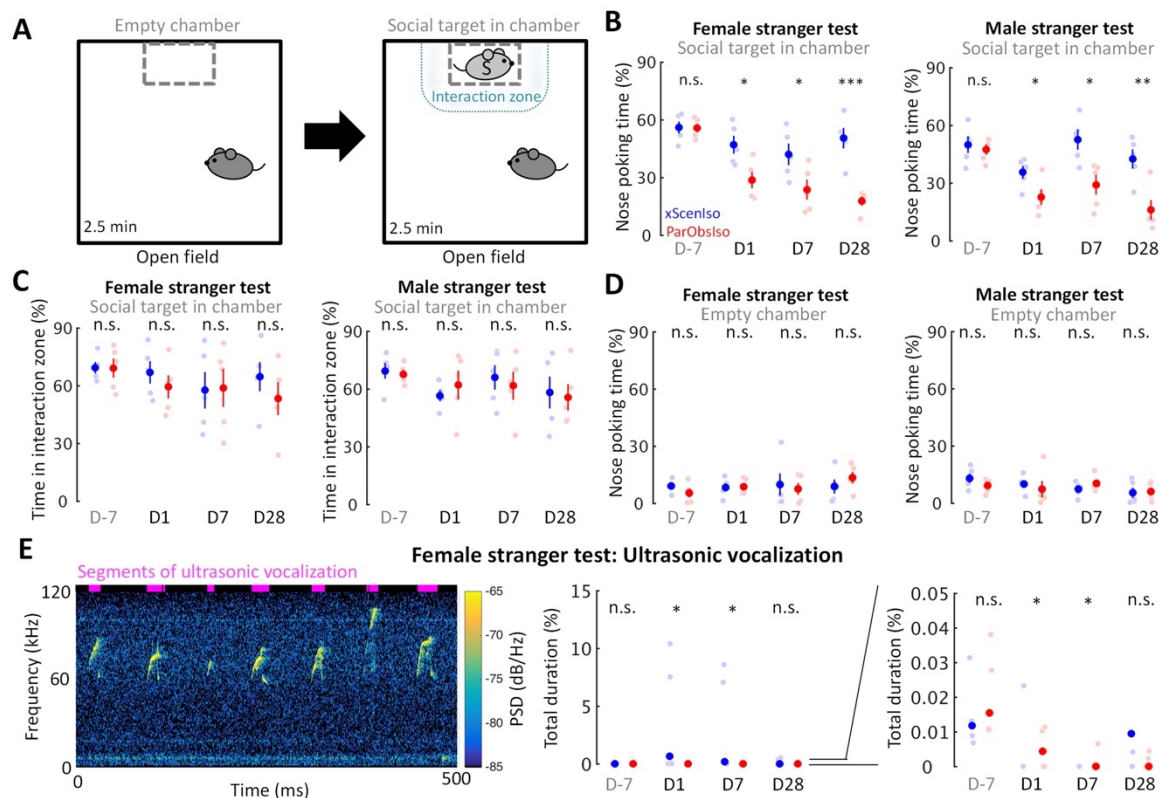

1483

1484 **Figure 8. Acute psychosocial trauma decreases social interest.** (A) The active social  
 1485 interaction test with consecutive non-social and social phases. During the social phase,  
 1486 motivation for social contact toward a stranger mouse (light gray S) was evaluated as the time  
 1487 spent for social approaches of nose poking and the time spent in the delineated interaction zone.  
 1488 (B) ParObsIso mice made fewer nose poking to both female (left) and male (right) strangers.  
 1489 (C) There was no significant difference in the time spent in the interaction zone during the  
 1490 social phase, suggesting a decrease of social interest instead of an active social avoidance. (D)  
 1491 There was no significant difference in the time spent of nose poking during the non-social  
 1492 phase, confirming that the observed differences of nose poking time stemmed from a  
 1493 specifically social root. (E) Spectrogram of short but conspicuous ultrasonic vocalizations  
 1494 emphasizes a specific behavioral repertoire during the social session in the female stranger test  
 1495 of a xScenIso mouse on Day1. More vocalization was recorded from xScenIso mice than  
 1496 ParObsIso mice on Days 1 and 7. Reduced ultrasonic vocalization during the social session of  
 1497 the female stranger test in ParObsIso mice attests to diminished social communication. Note  
 1498 that data points greater than 0.05% are not visible in the right panel which zoom in the data of  
 1499 the middle panel to emphasize the data distributions in the range of 0–0.05%. Data points and  
 1500 median, one-tailed Mann-Whitney U test; PSD, power spectral density.

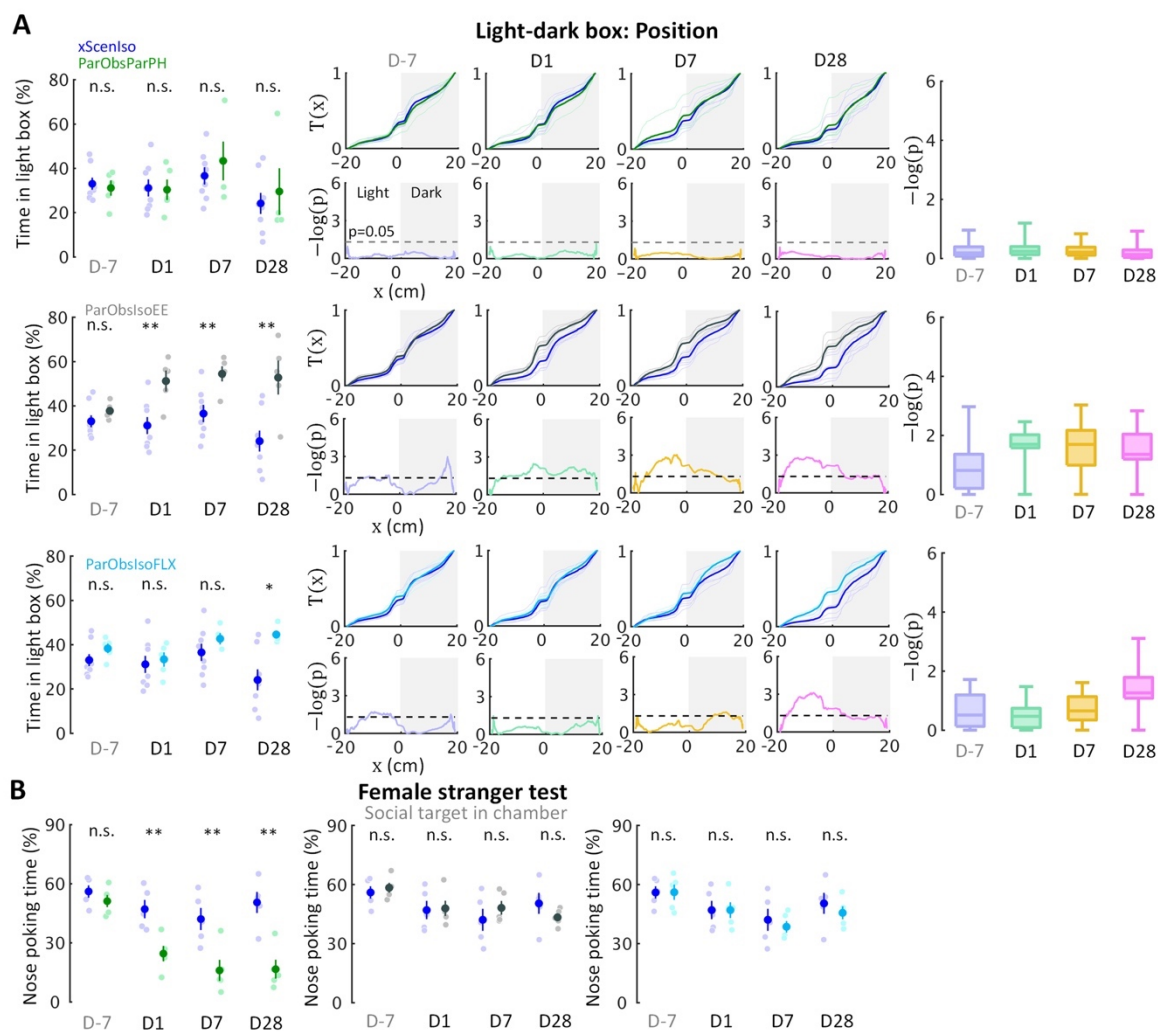

1501

1502 **Figure 9. Developments of emotional and social differences are not inter-dependent. (A)**

1503 Positions in the light-dark box test indicate that ParObsParPH mice did not develop the chronic

1504 stress reactions, ParObsIsoEE mice developed chronic stress reactions which were stronger

1505 than that of ParObsIso mice in the early phase, and ParObsIsoFLX developed stress reactions

1506 in the late phase. **(B)** Nose poking times in the female stranger test indicate that ParObsParPH,

1507 but not ParObsIsoEE and ParObsIsoFLX, mice develop the social differences of ParObsIso

1508 mice.

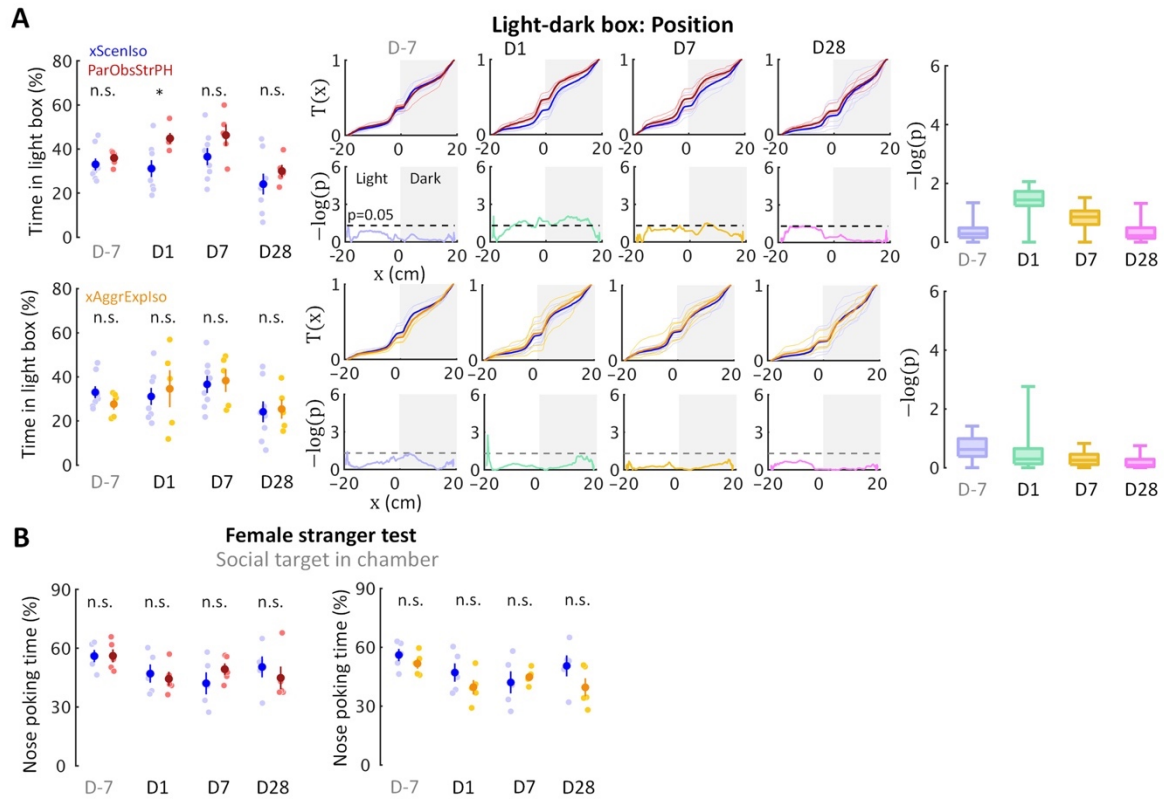

1509

1510 **Figure 10. Control experiments identify necessity of relationship-dependent vicarious**  
 1511 **defeat for anxiety incubation. (A)** Positions in the light-dark box test indicate that both  
 1512 xAggrExpIso and ParObsStrPH mice did not develop the behavioral differences in the late  
 1513 phase, although ParObsStrPH mice displayed the difference in the early phase. **(B)** Nose  
 1514 poking times in the female stranger test indicate that xAggrExpIso and ParObsStrPH mice did  
 1515 not develop the social differences.

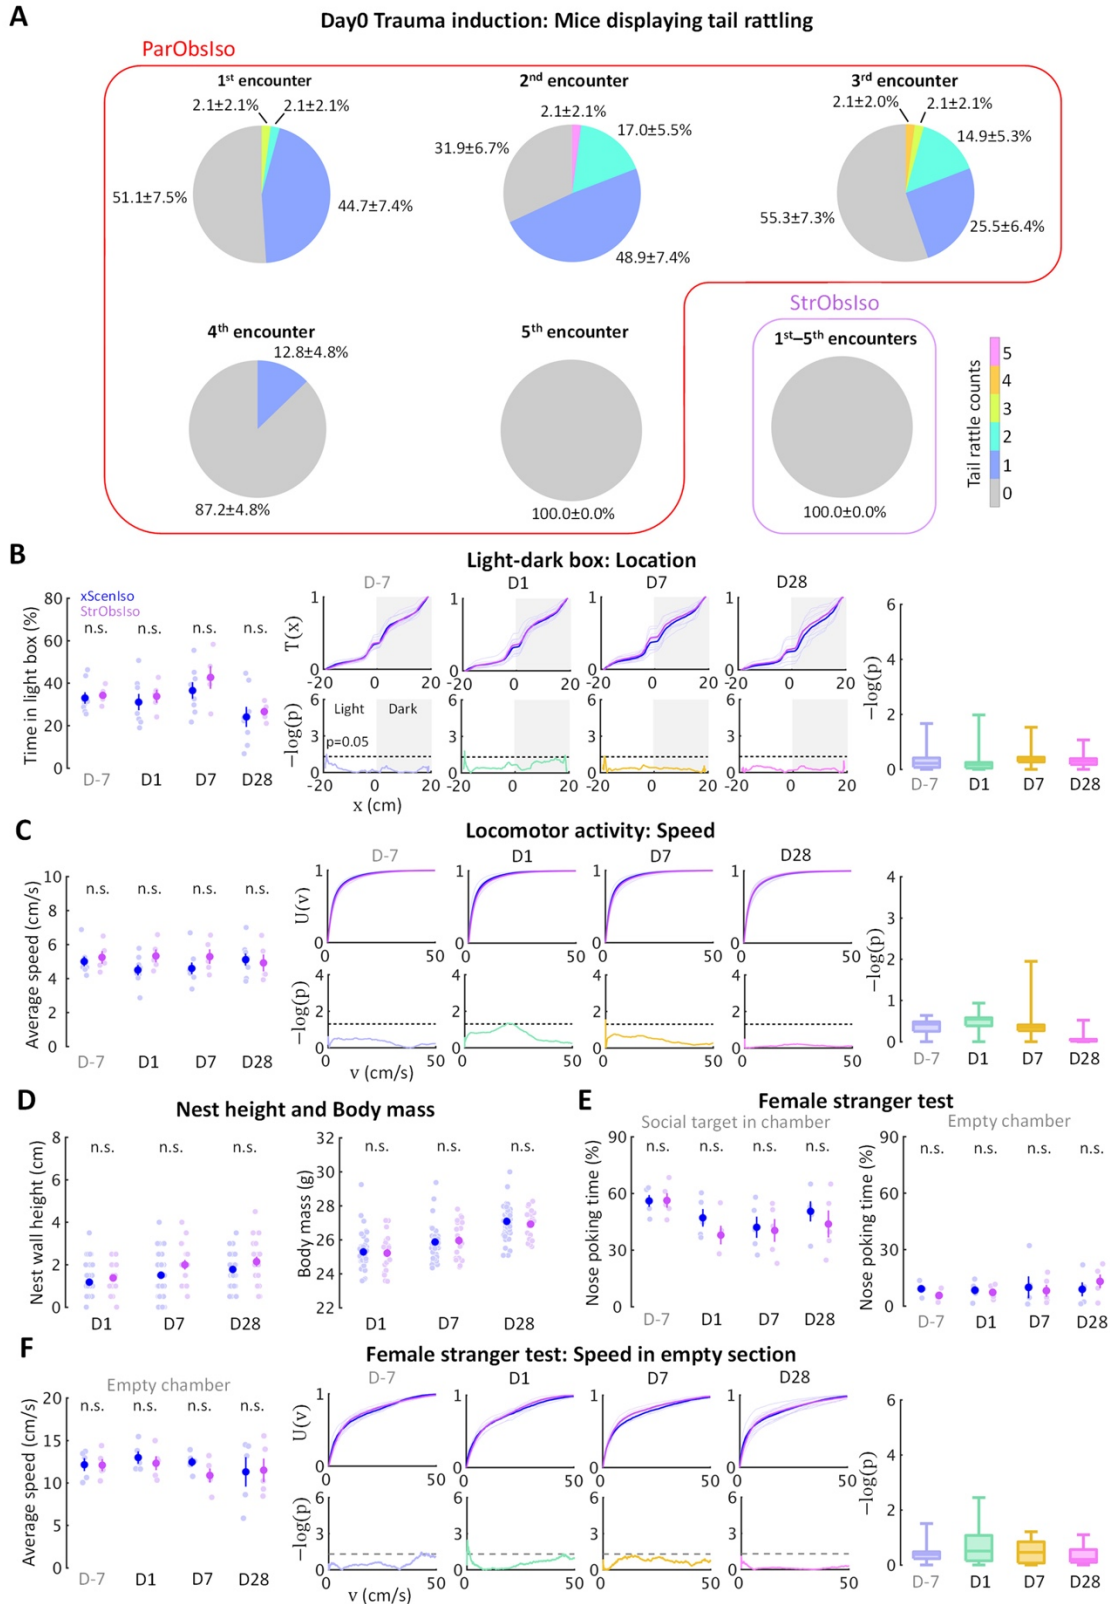

1516

1517 **Figure 11. Social relationship in trauma induction determines stress development. (A)**  
 1518 Social relationship increased emotional impact, evidenced by tail rattling behavior during  
 1519 trauma induction. **(B–F)** No significant acute or chronic difference was found in StrObsIso  
 1520 mice.

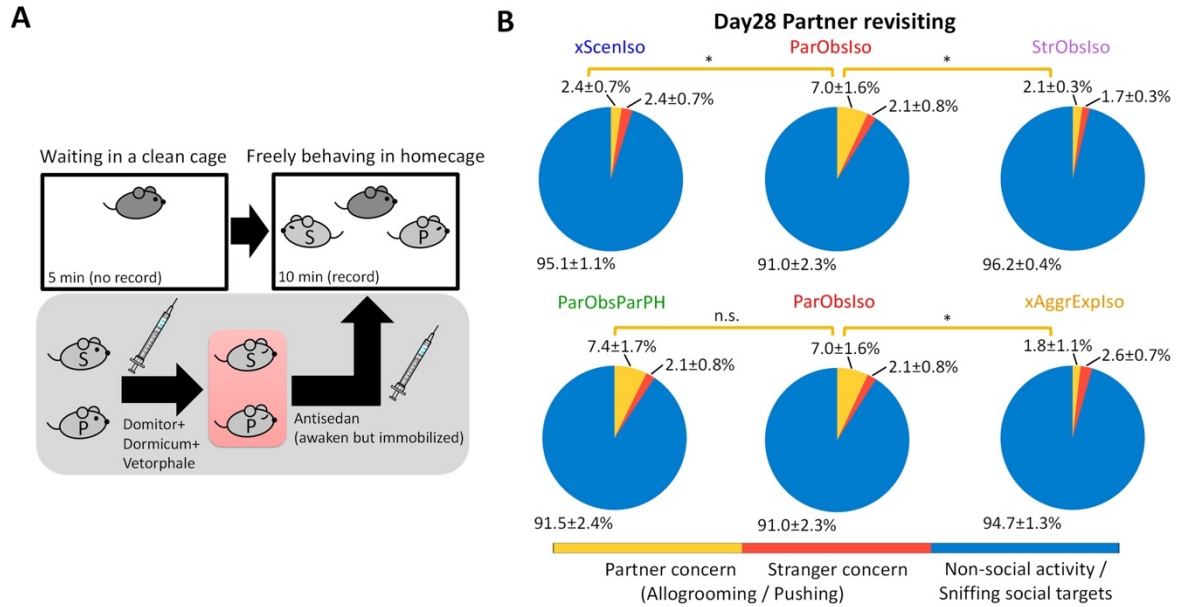

1521

1522 **Figure 12. Long-term memory of partnership correlates with anxiety incubation. (A)**  
 1523 The partner-revisiting test. A stranger mouse (light gray S) and the previously pair-housed  
 1524 partner (light gray P), both immobilized, were presented as social targets. Pink rectangle,  
 1525 heating pad. (B) ParObsIso and ParObsParPH mice showed significantly longer allogrooming  
 1526 or pushing their partners (yellow, % of time spent in partner concern behavior) than either  
 1527 xScenIso, xAggrExpIso, or StrObsIso mice. Standard errors were calculated from  
 1528 bootstrapped data.



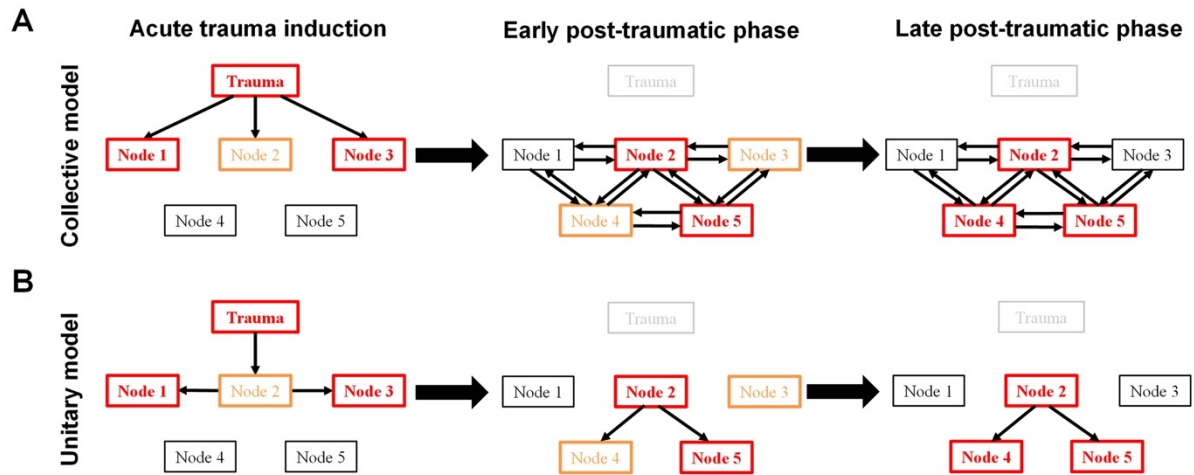

1529

1530 **Figure 13. Two conceptual models of the post-traumatic stress incubation process. (A)** In  
1531 the collective model, different psychological elements (Node #, a type of emotion or cognition)  
1532 influence each other during different phases of stress incubation. **(B)** In the unitary model a  
1533 single common factor underlies the development of post-traumatic behaviors. Orange and red  
1534 boxes represent medium and strong trauma-induced differences, respectively. It is assumed  
1535 that each psychological element can be connected to an associated neural substrate with  
1536 trauma-induced dynamic changes.

## Day28 Diffusion tensor imaging: Fractional anisotropy (FA)

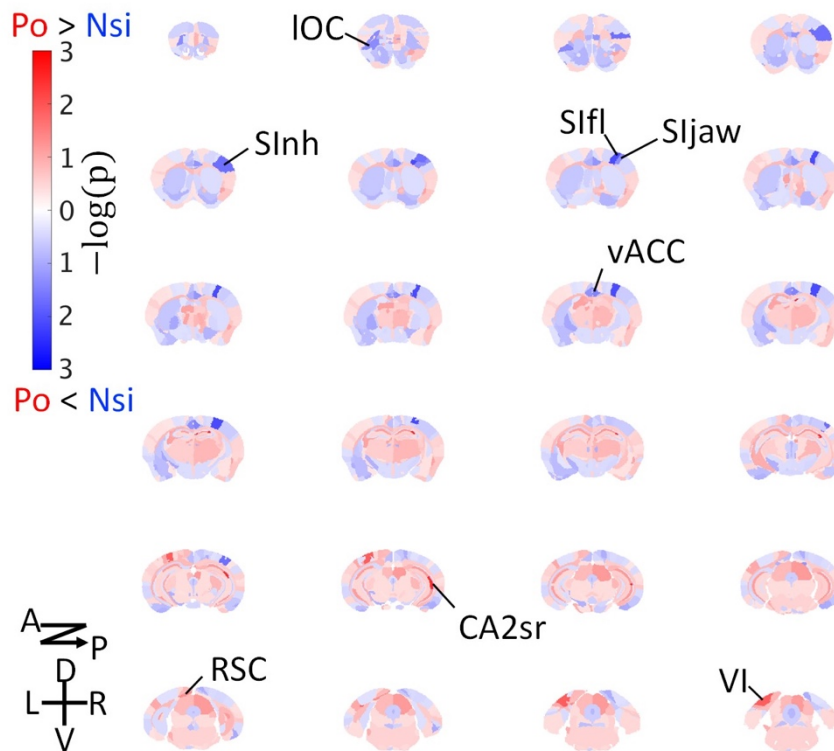

1537

1538 **Supplemental Figure 1. Brain-wide microstructural changes measured by DTI fractional**  
1539 **anisotropy.** Po, ParObsIso mice; Nsi, xScenIso mice; -log(p), statistical significance through  
1540 a two-population Student's t-test; A, anterior; P, posterior; D, dorsal; V, ventral; L, left; R,  
1541 right; IOC, lateral orbital cortex; SInh, non-homunculus region of the primary sensory cortex;  
1542 SIfI, forelimb region of the primary sensory cortex; SIjaw, jaw region of the primary sensory  
1543 cortex; vACC, ventral region of the anterior cingulate cortex; CA2sr, stratum radiatum of the  
1544 hippocampal cornu ammonis (CA) 2 area; RSC, the retrosplenial cortex; VI, the primary visual  
1545 cortex.

## Day28 Diffusion tensor imaging: Mean diffusivity (MD)

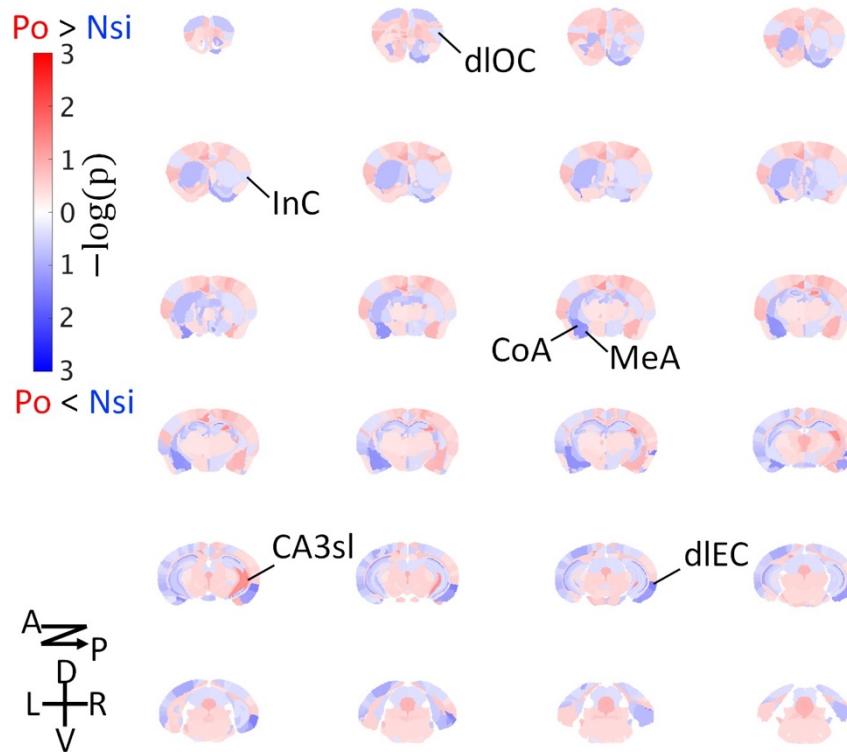

1546

1547 **Supplemental Figure 2. Brain-wide microstructural changes measured by DTI mean**  
1548 **diffusivity.** dLOC, dorsolateral orbital cortex; InC, the insular cortex; CoA, the cortical  
1549 amygdalar nucleus; MeA, medial amygdalar nucleus; CA3sl, stratum lucidum of the  
1550 hippocampal CA3 area; dIEC, dorsolateral entorhinal cortex.

### Day28 Diffusion tensor imaging: Axial diffusivity (AD)

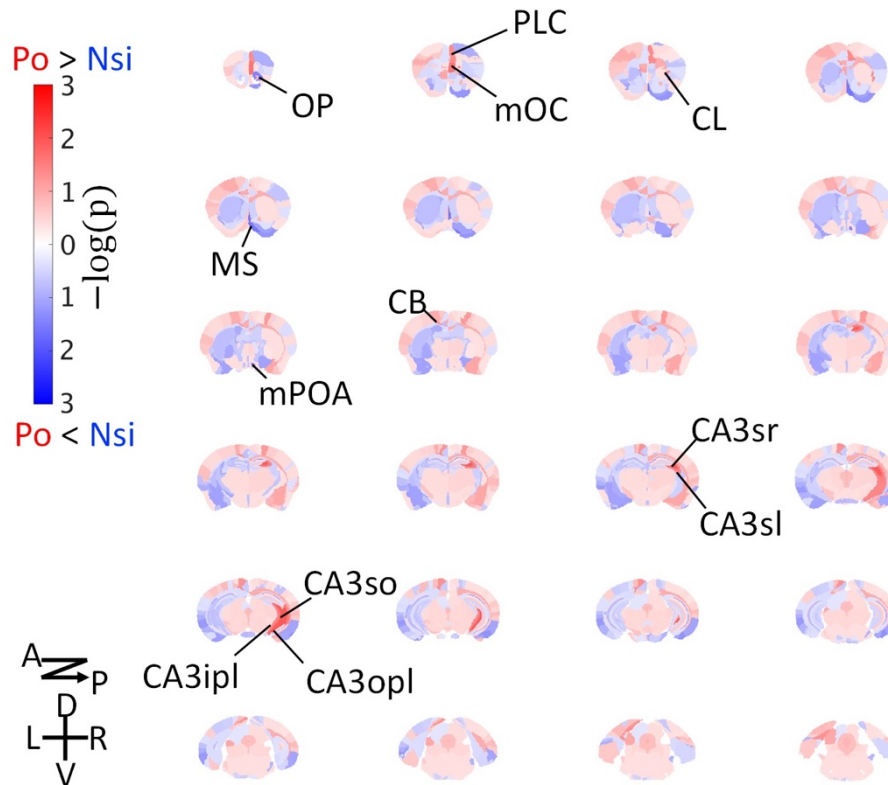

1551

1552 **Supplemental Figure 3. Brain-wide microstructural changes measured by DTI axial**  
1553 **diffusivity.** OP, olfactory peduncle; PLC, prelimbic cortex; mOC, medial orbital cortex; CL,  
1554 claustrum; MS, medial septal complex; mPOA, medial preoptic area; CB, cingulum bundle;  
1555 CA3sr, stratum radiatum of the hippocampal CA3 area; CA3sl, stratum lucidum of the  
1556 hippocampal CA3 area; CA3so, stratum oriens of the hippocampal CA3 area; CA3ipl, inner  
1557 pyramidal layer of the hippocampal CA3 area; CA3opl, outer pyramidal layer of the  
1558 hippocampal CA3 area.

## Day28 Diffusion tensor imaging: Radial diffusivity (RD)

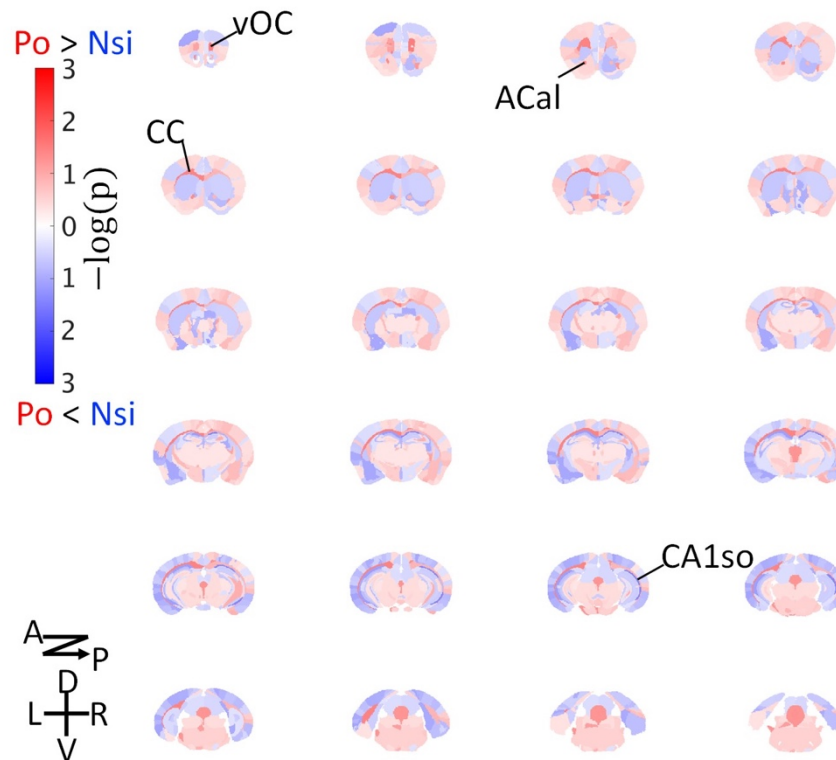

1559

1560 **Supplemental Figure 4. Brain-wide microstructural changes measured by DTI radial**  
1561 **diffusivity.** vOC, ventral orbital cortex; ACal, anterior limb of the anterior commissure; CC,  
1562 corpus callosum; CA1so, stratum oriens of the hippocampal CA1 area.

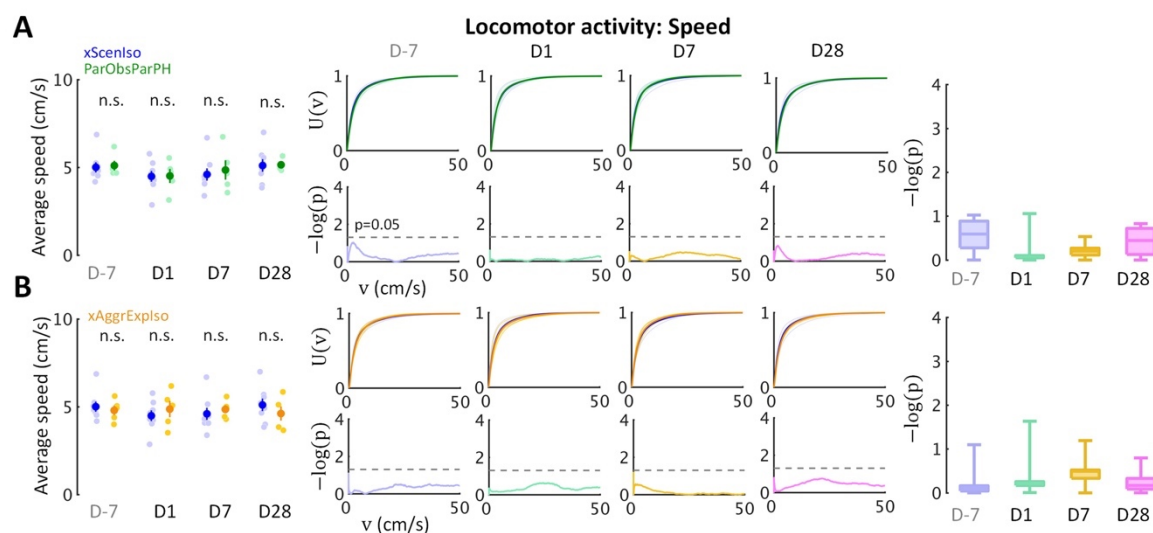

1563

1564 **Supplemental Figure 5. Locomotor activity tests in control experiments agree with the**  
1565 **conclusions of spontaneous behaviors given from the light-dark box tests. (A) The results**  
1566 **of ParObsIsoFLX mice. (B) The results of ParObsStrPH mice.**

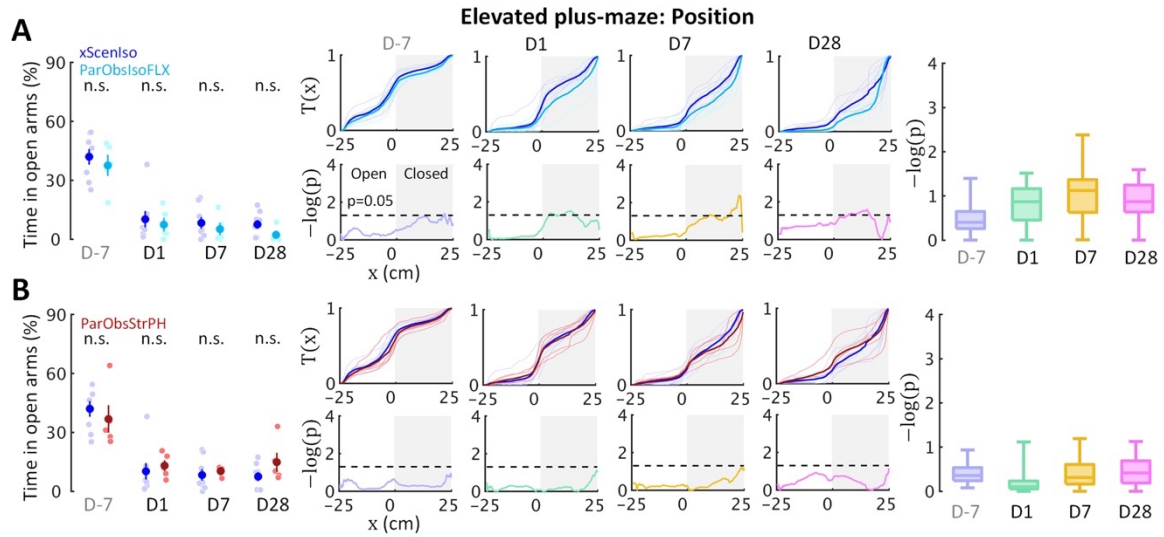

1567

1568

1569

1570

**Supplemental Figure 6. Elevated plus-maze tests in control experiments agree with the conclusions of spontaneous behaviors given from the light-dark box tests. (A) The results of ParObsParPH mice. (B) The results of xAggrExpIso mice.**

1571 **Supplemental Video 1.** Landscape in the 4-D state space of local likelihood of caffeine-  
1572 injected behaviors in the light-dark box test.

1573 **Supplemental Video 2.** Landscape in the 4-D state space of local likelihood of foot-shocked  
1574 behaviors in the light-dark box test.

1575 **Supplemental Video 3.** Landscape in the 4-D state space of local likelihood of control  
1576 behaviors in the light-dark box test.

1577 **Supplemental Video 4.** Landscape in the 4-D state space of local likelihood of caffeine-  
1578 injected behaviors in the elevated plus-maze test.

1579 **Supplemental Video 5.** Landscape in the 4-D state space of local likelihood of foot-shocked  
1580 behaviors in the elevated plus-maze test.

1581 **Supplemental Video 6.** Landscape in the 4-D state space of local likelihood of control  
1582 behaviors in the elevated plus-maze test.

1583 **Supplemental Video 7.** Social apathy is an observed behavioral characteristic of ParObsIso  
1584 mice. Examples of 30-s recordings during the social session in the female stranger test on  
1585 Day1. First scene, xScenIso mouse; Second scene, ParObsIso mouse.

1586 **Supplemental Video 8.** Illustration of behavioral characteristics that were specific to observer  
1587 mice during trauma induction when their partners were attacked. First scene, tail rattling during  
1588 aggressive encounter; Second scene, tail rattling during aggressive encounter (4x slower);  
1589 Third scene, hiding under bedding material with the partner during resting. These behaviors  
1590 were not observed if a stranger mouse got attacked.

1591 **Supplemental Video 9.** Illustration of rebound reaction of a ParObsIso mouse to its previously  
1592 pair-housed partner during the partner-revisiting test.
